# Supplementary material
Source: Research Square preprint supplement (doi:10.21203/rs.3.rs-7962748/v1)
Supplement: Supplementary file 1 [file a283f92632e7f5ed143d043d.docx]

**Supplementary data**

***β-Oxo*anilides in Heterocyclic Synthesis: Synthesis of polyfunctionally substituted Pyridines Incorporating Pyrimidine Moiety: Quantum Chemical Calculations for Corrosion Inhibition using DFT Studies**

Abdel Haleem M. Hussein1,Ashraf M. Ashmawy2*,Mohamed. Abdel Rady3, Mohamed A. M. Gad-Elkareem1, andM. A. Mostafa4

1 Department of Chemistry, Faculty of Science, Al-Azhar University, Assiut 71524, Egypt.

2Chemistry Department, Faculty of Science, Al-Azhar University, Nasr City 11884, Cairo, Egypt

3Assiut International Center of Nanomedicine, Al-Rajhy Liver Hospital, Assiut University.

4 Department of Chemistry Faculty of Science Luxor University, Egypt.

* Email: [Ma.Abdelhakeim@sci.luxor.edu.eg](mailto:Ma.Abdelhakeim@sci.luxor.edu.eg)

**Contents:**

1. Experimental data: page 1
2. Spectral charts (IR, 1H NMR, 13C NMR and MS): page 4

Ethyl 2-amino-4-methyl-6-oxo-1-(pyrimidin-2-yl)-1,6-dihydropyridine-3-carboxylate (10):

A solution of compound 9 (54.85 mg, 0.20 mmol) in sodium ethoxide (formed from 30 ml ethanol and 4.6 mg, 0.20 mmol of sodium metal), was refluxed for 3 hrs. and after cooling, the reaction mixture was poured into ice cold water, acidified by dilute HCl, the solid product formed was filtered off and crystallized from ethanol to give 10 (29.62 mg, 54 %) as yellow crystals; m.p = 257-260 0C; IR cm-1 ν = 3465, 3400 (NH2), 1686 (CO); Anal. Calcd. for C13H14N4O3 (274.28): C 56.93, H 5.14, N 20.43%. Found: C 56.93, H 5.15, N 20.43%.

**Synthesis of nicotinonitrile derivatives 15 and 17; General procedure:**

A mixture of **1** (35.8 mg, 0. 20 mmol) and each of (arylidinecyanothioacetamide of *P*-chlorobenzaldehyde (44.54 mg, 0.20 mmol)) or (mixture of cyanothioacetamide and acetaldehyde (25.23 mg. 0.20 mmol)) in ethanol (30 ml) was treated with a few drops of piperidine and refluxed for 5 hrs., then left to cool and poured into crushed ice and acidified with HCl. The solid product was collected and recrystallized from ethanol to give the nicotinonitrile derivatives **15** and **17** respectively.

**5-Acetyl-4-(4-chlorophenyl)-2-mercapto-6-(Pyrimidin-2-ylamino)-nicotinonitrile (15):** yellow crystals of yield (63.83 mg, 83%), m.p.= 243-245 °C. IR cm-1 ν = 3432 (NH), 2222 (CN), 1670 (CO); 1H NMR δ ppm = 2.44 (s, 3H, CH3), 6.8 (s, 1H, SH), 7.25-7.78 (m, 8H, Ar-H and NH); 13C NMR δ C= 110.2 (q), 111 (s), 114 (d), 117 (SCN) 128.9 (d), 130.5 (d), 131.4 (s), 134.9 (s), 154 (d), 155.8 (d), 158 (d), 178 (CO); MS: m/z = 382 (M+); Anal. Calcd. for C18H12ClN5OS (381.84): C 56.62, H 3.17, N 18.34%. Found: C 56.62, H 3.17, N 18.34%.

**5-Acetyl-2-mercapto-4-methyl-6-(Pyrimidin-2-ylamino) nicotinonitrile (17):**

Yellow crystals of yield (38.23 mg, 67%), m.p.= 258-260 °C, IR cm-1 ν = 3350 (NH), 2220 (CN), 1670 (CO). 1H NMR(DMSO) δ ppm = 2.34 (s, 3H, CH3), 2.47 (s, 3H, CH3), 7.05-7.26 (d, 1H, J = 8.4 Hz, pyrimidine-H), 8.69 (s, 2H, pyrimidine-H’s), 11.24 (s, 1H, NH) 14.06 (s, 1H, NH); 13C NMR δC = 17.8 (q), 19.3 (q), 114.6 (s), 114.6 (s), 116.4 (SCN), 118.2 (s), 124.3 (s), 153.9 (s), 157.4 (d), 157.4 (d), 177.7 (CO); MS: m/z = 287 (M+2); Anal. Calcd. for C13H11N5OS (285.32): C 54.72, H 3.89, N 24.55%. Found: C 54.72, H 3.90, N 24.57%.

**4-(4-Chlorophenyl)-5-[(1E)-ethanehydrazonoyl]-2-hydrazino-6-(pyrimidin-2-ylamino) nicotinonitrile (18):**

A solution of compound **15** (62.04 mg; 0.20 mmol) in ethanol (10 ml) was treated with an excess of hydrazine hydrate (10 ml). The mixture was heated under reflux for 12 hrs. and left to stand. Poured on ice cold water and acidified with HCl. The solid product so formed was obtained by filtration and recrystallized from ethanol to give **18** (68.52 mg; 87%); as yellow crystals;m.p = 292-294°C; IR cm-1 ν = 3434-3100 (NH2 and NH), 2221 (CN); 1H NMR (DMSO) δ ppm = 2.39 (s, 3H, CH3), 6.45 (s, 4H, 2NH2), 7.34-7.63 (m, 7H, Ar-H),13.97 (br, 2H, 2NH). Anal. Calcd. for C18H16ClN9 (393.833): C 54.89; H 4.09; N 32.01 % Found: C 54.91; H 4.10; N 32.03 %

**Ethyl {[5-acetyl-4-(4-chlorophenyl)-3-cyano-6-(pyrimidin)-2-ylamino)pyridin-2-yl]thio}acetate (19):**

To a solution of **15** (62.04 mg; 0.20 mmol) in ethanol, ethyl chloroacetate (24.5 mg; 0.20 mmol) and sodium acetate (0.5g) were added. The mixture was refluxed for 4 hrs. cooled, poured into crushed ice and acidified with HCl and the precipitate was recrystallized from ethanol to give **19** (77.67 mg; 83 %) as brown crystals ;m.p = 166-168°C; IR cm-1 ν =3481 (NH) , 2218 (CN), 1735 (CO), 1672 (CO); 1H NMR (CDCl3) δ ppm = 1.31-1.33 (t, 3H, J = 7.2 Hz, CH3), 2.60 (s, 3H, CH3), 4.03 (s, 2H, CH2), 4.24-4.27 (q, 2H, J = 7.2 Hz, CH2), 6.92-7.55 (m, 6H, Ar-H), 8.43-8.45 (d, 1H, J = 7.8 Hz, pyrimidine-H), 9.17 (br, 1H, NH) ; 13C NMR δ C = 14.22(q), 32.6(q), 60.6(t), 61.7(t), 114.4(d), 116.5(s, CN), 128.2(s), 128.6(d), 129.2(d), 152.6(s), 158.3(d), 158.3(d), 161.7(d), 168.6(s, CO), 168.8(s, CO). Anal. Calcd. for C22H18ClN5O3S (467.929): C 56.47; H 3.88; N 14.97 % Found: C56.49; H 3.89; N 14.99 %.

**Ethyl 5-acetyl-3-amino-4-(4-chlorophenyl)-6-(pyrimidin-2-ylamino)thieno[2,3-*b*]-pyridine-2-carboxylate (20):**

To a solution of sodium ethoxide prepared from sodium metal (1gm) and ethanol (10 ml), a solution of **15** (62.04 mg; 0.20 mmole) in ethanol (20 ml) was added. The reaction mixture was refluxed for **3** **hrs.,** after cooling the reaction mixture waspoured into cold water (50 ml) and acidified with HCl. The product formed was collected by filtration and recrystallized from ethanol to give **20** (67.38 mg; 72 %). as brown crystals; m.p = 190-192°C; IR cm-1 ν =3483, 3436, 3354 (NH2 and NH), 1731 (CO), 1673 (CO); 1H NMR (CDCl3) δ ppm =1.36-1.38 (t, 3H, J = 7.2 Hz, CH3), 2.60 (s, 3H, CH3), 4.28-4.30 (q, 2H, J = 7.2 Hz, CH2), 6.98-7.47 (m, 8H, Ar-H and NH2) ; 8.40-8.42 (d, 1H, J = 7.8 Hz, (pyrimidine-H), 9.16 (br, 1H, NH) ; 13C NMR δ ppm C =14.21(q) ;14.49(q) ;60.51(t) ;128.2(d) ;128.6(s)129.0(s) ;129.3(d) ;152.6(d) ;152.6(d) ;156.5(s) ;159.2(s) ;168.8(s. CO) ;168.8(s, CO). Anal. Calcd. for C22H18ClN5O3S (467.929): C 56.44; H 3.87; N 14.77 % Found: C 56.42; H 3.85; N 14.79 %.

**1-[3-Amino-6-(pyrimidin-2-ylamino)-4-sulfanylthieno[3,4-*c*]pyridin-7-yl]ethenone (21):**

Equimolar amount of **17** (57.06 mg; 0.20 mmole) and elemental sulfur (6.4 mg; 0.20 mmole) in ethanol (30 ml) were treated with triethylamine (0.5 ml) and refluxed for 4 hrs., the solid that formed after cooling was collected and recrystallized from benzene to give **21** (39.98 mg; 63 %) as dark green crystals ;m.p = 293-295°C; IR cm-1 ν = br 3437 (NH2, SH), 1725(CO); -1H NMR (DMSO) δ ppm = 2.25 (s, 3H, CH3), 6.80-8.60 (m, 6H, Ar-H and NH2), 11.27 (s, 1H, NH), 14.20 (s, 1H, SH). Anal. Calcd. for C13H11N5OS2 (317.329): C 49.19; H 3.49; N 22.07 % Found: C 49.20; H 3.50; N 22.09 %

**Preparation of compounds (22a,b):**

**General procedure:**

A mixture of **17** (57.06 mg; 0.20 mmole), α-cyano-4-substituted cinnamonitrile (0.20 mmole) in ethanol (30 ml) was treated with a little amount of piperidine and heated under reflux for 8 hrs. The reaction mixture allowed to cool and poured into crushed ice and acidified with HCl. The solid product was filtered off and recrystallized from the proper solvent to give **22a,b**.

**4-Acetyl-8-amino-6-(4-chlorophenyl)-1-mercapto-3-(pyrimidin-2-ylamino)-isoquinoline-7-carbonitrile (22a):**

It was obtained as brown crystals from ethanol; yield 47.37 mg; 53%; m.p =193-195°C; IR cm-1 ν = br 3352-3100 (NH2 and SH), 2210 (CN), 1707 (CO); 1H NMR(DMSO) δ ppm = 2.37 (s, 3H, CH3), 7.04-7.95 (m, 9H, Ar-H and NH2), 11.23 (s, 1H, NH), 14.06 (s, 1H, SH). Anal. Calcd. for C22H15ClN6OS (446.913): C 59.12; H 3.38; N 18.80 % Found: C 59.14; H 3.40; N 18.81 %.

**4-Acetyl-8-amino-1-mercapto-6-(4-methoxyphenyl)-3-(pyrimidin-2-ylamino)-isoquinoline-7-carbonitril(22b):**

It was obtained as dark brown crystals from ethanol ; yield 61.06 mg; 69 %;m.p = 258-260°C; IR cm-1 ν = br 3226-3100 (NH2, SH), 2222 (CN), 1672 (CO); 1H NMR (DMSO) δ ppm = 2.46 (s, 3H, CH3), 3.90 (s, 3H, OCH3), 7.0-7.13 (d, 4H, J = 7.8 Hz, Ar-H), 7.9-8.02 (d, 4H, J = 7.8 Hz, Ar-H and NH2); 8.31-8.42 (m, 2H, Ar-H), 11.32 (s, 1H, NH), 14.06 (s, 1H, SH); 13C NMR δ ppm C =22.6(q), 55.1(q), 113.8(s), 114.1(s), 114.4(d), 114.7(d), 115.9(s), 117.7(d), 124.1(d), 131.7(d), 133.3(d), 133.5(d), 158.5(s), 158.5(d), 158.5(d), 160.4(d), 164.3(s, CO). Anal. Calcd. for C23H18N6O2S (442.494): C 62.43; H 4.10; N 18.99 % Found: C 62.44; H 4.12; N 19.01 %.

**
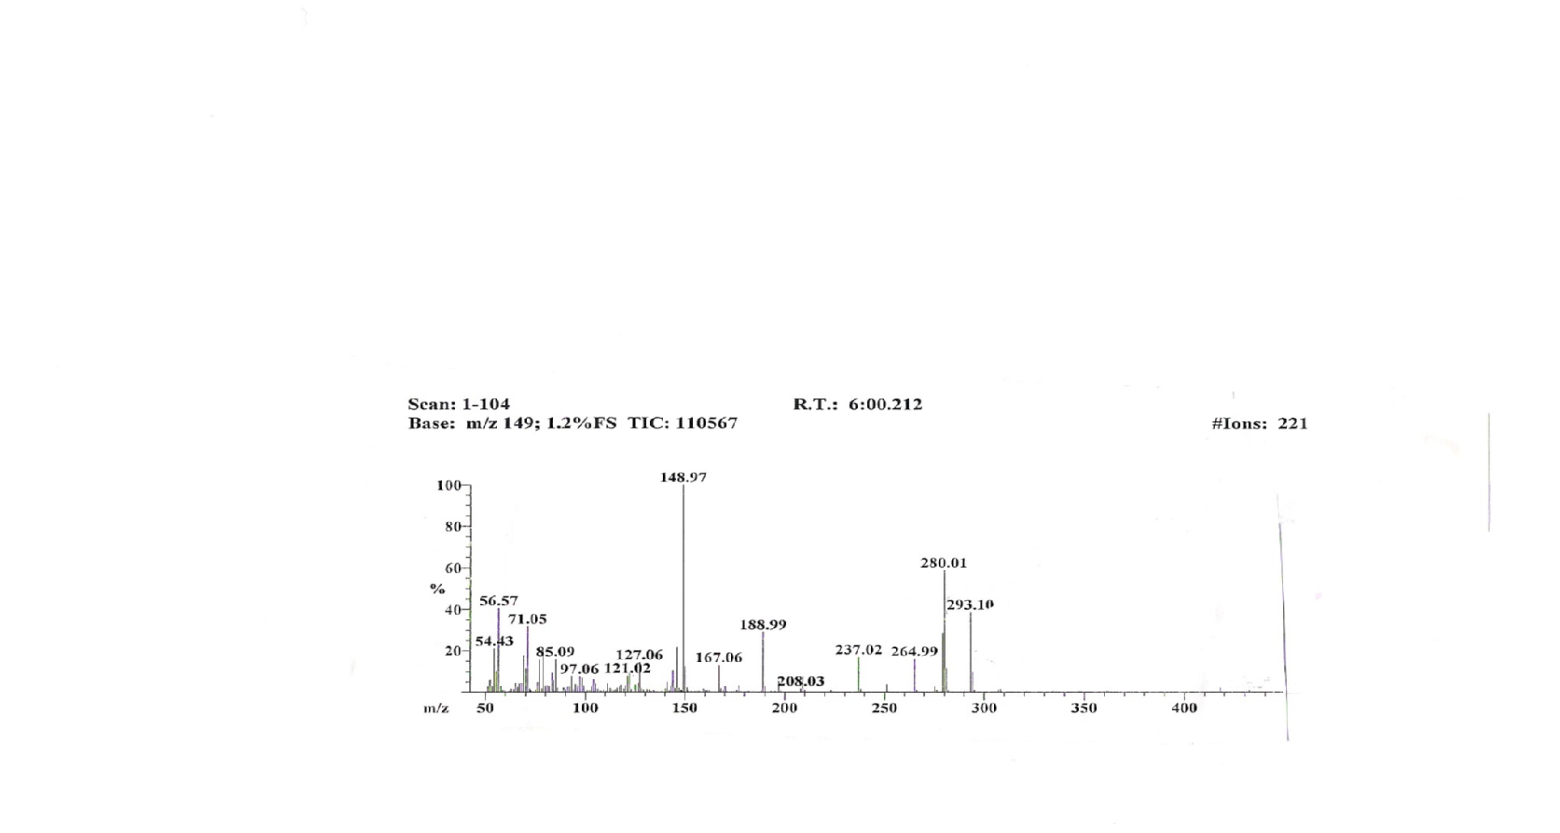
**

**Fig (1): Mass spectrum of Compound 5:**

**
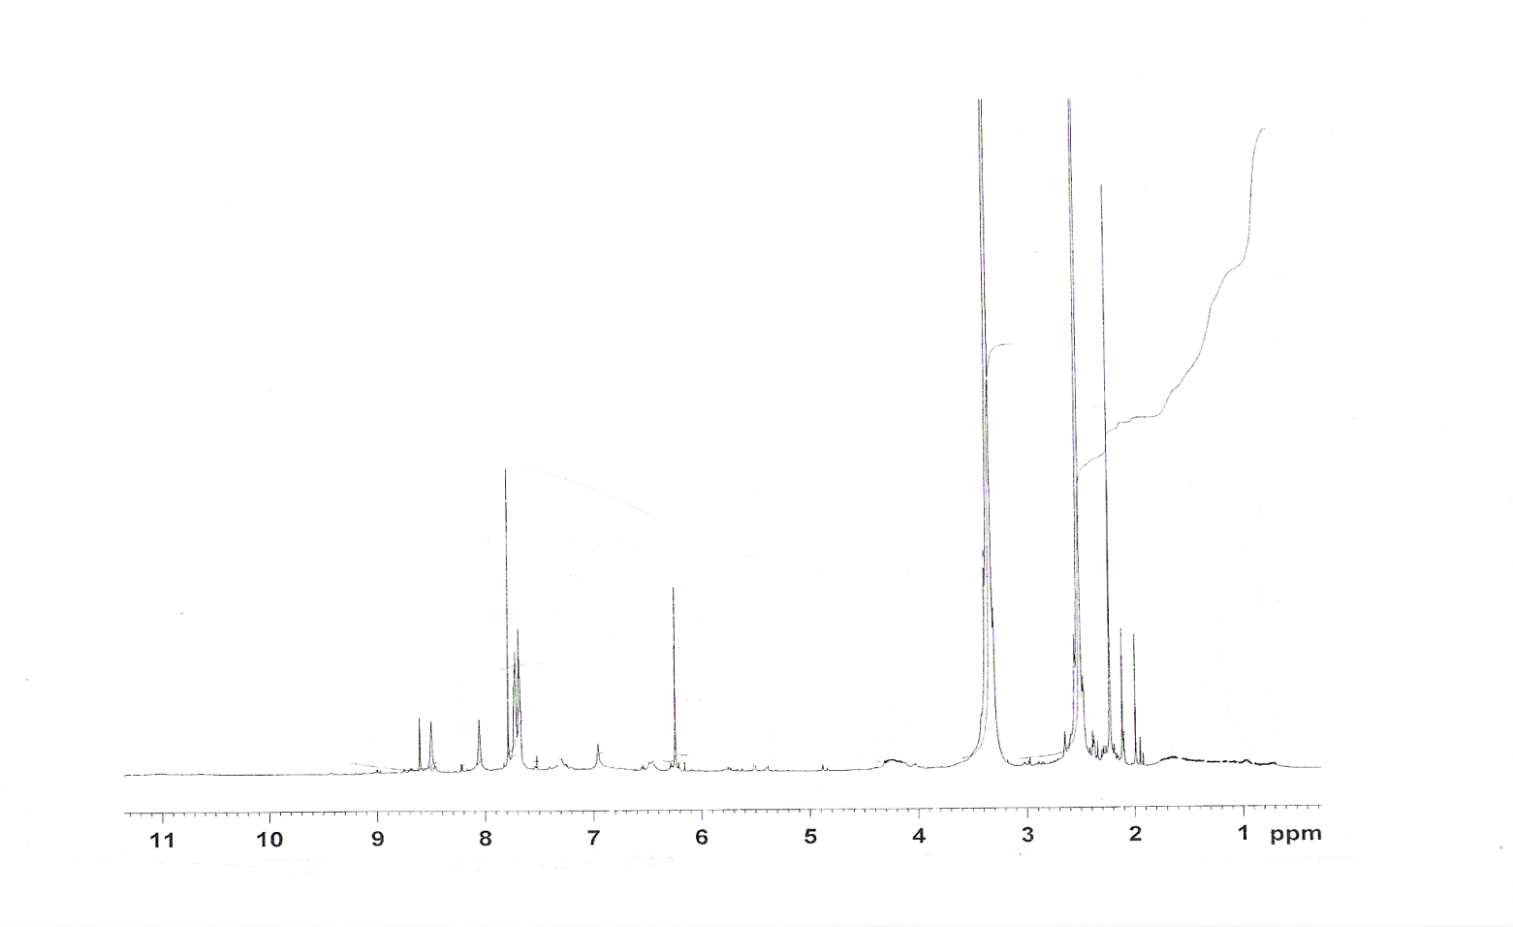
**

**Fig ( 2 ): 1H NMR Spectrum of Compound (5)**

**
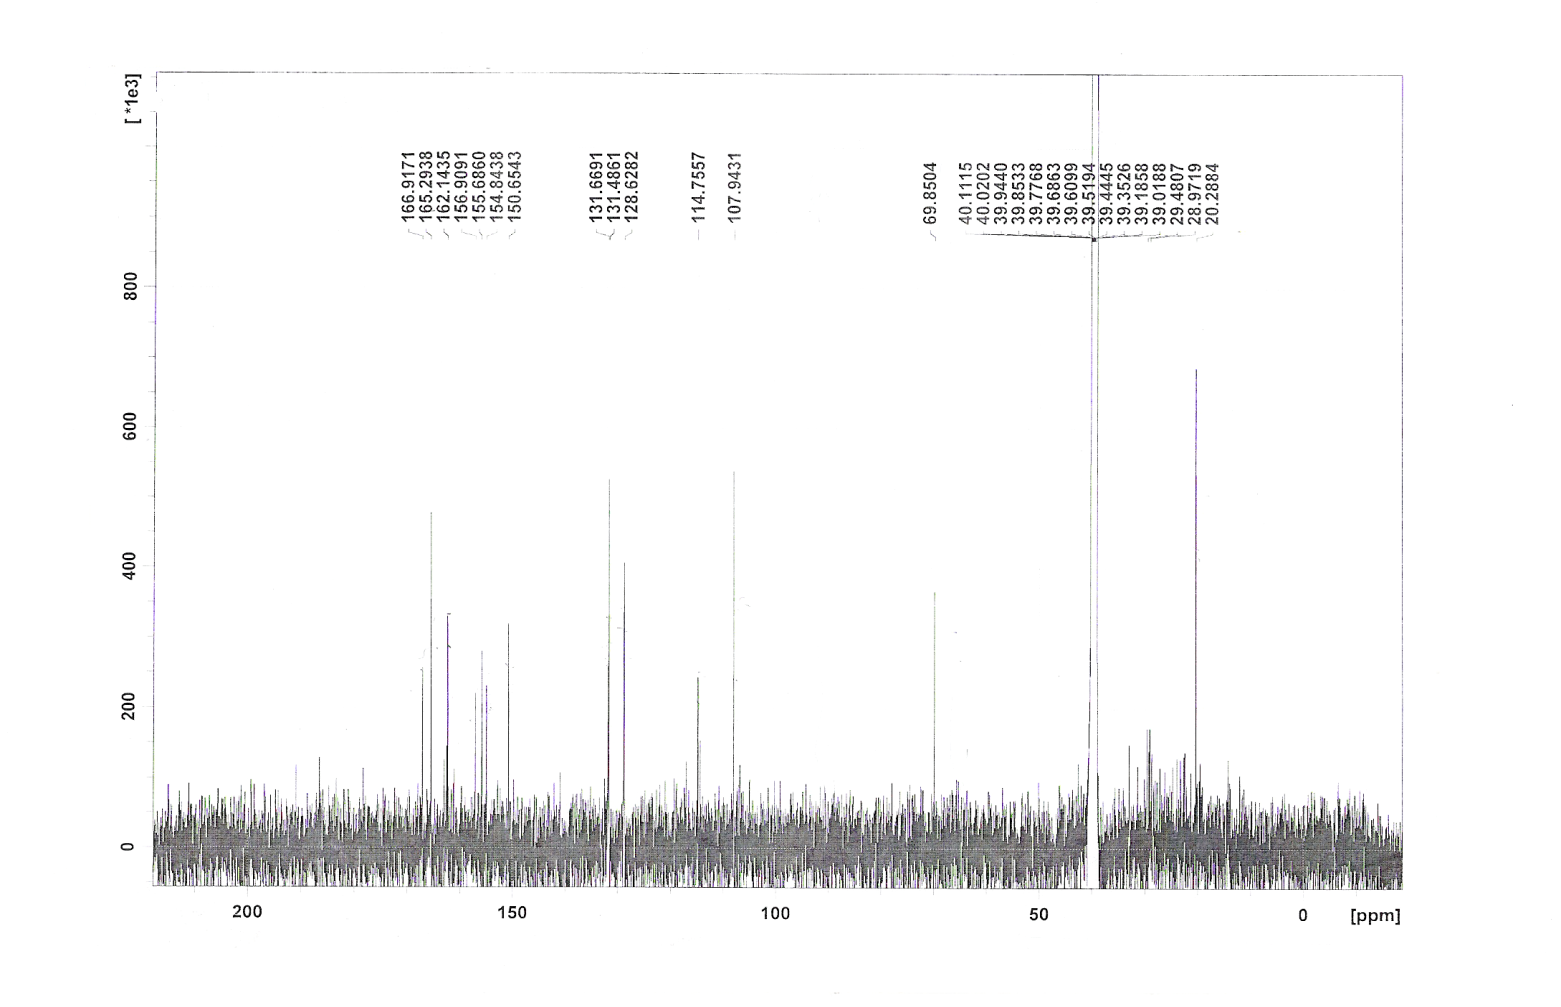
**

**Fig ( 3 ): 13C NMR Spectrum of compound (5)…….Solvent DMSO**

**
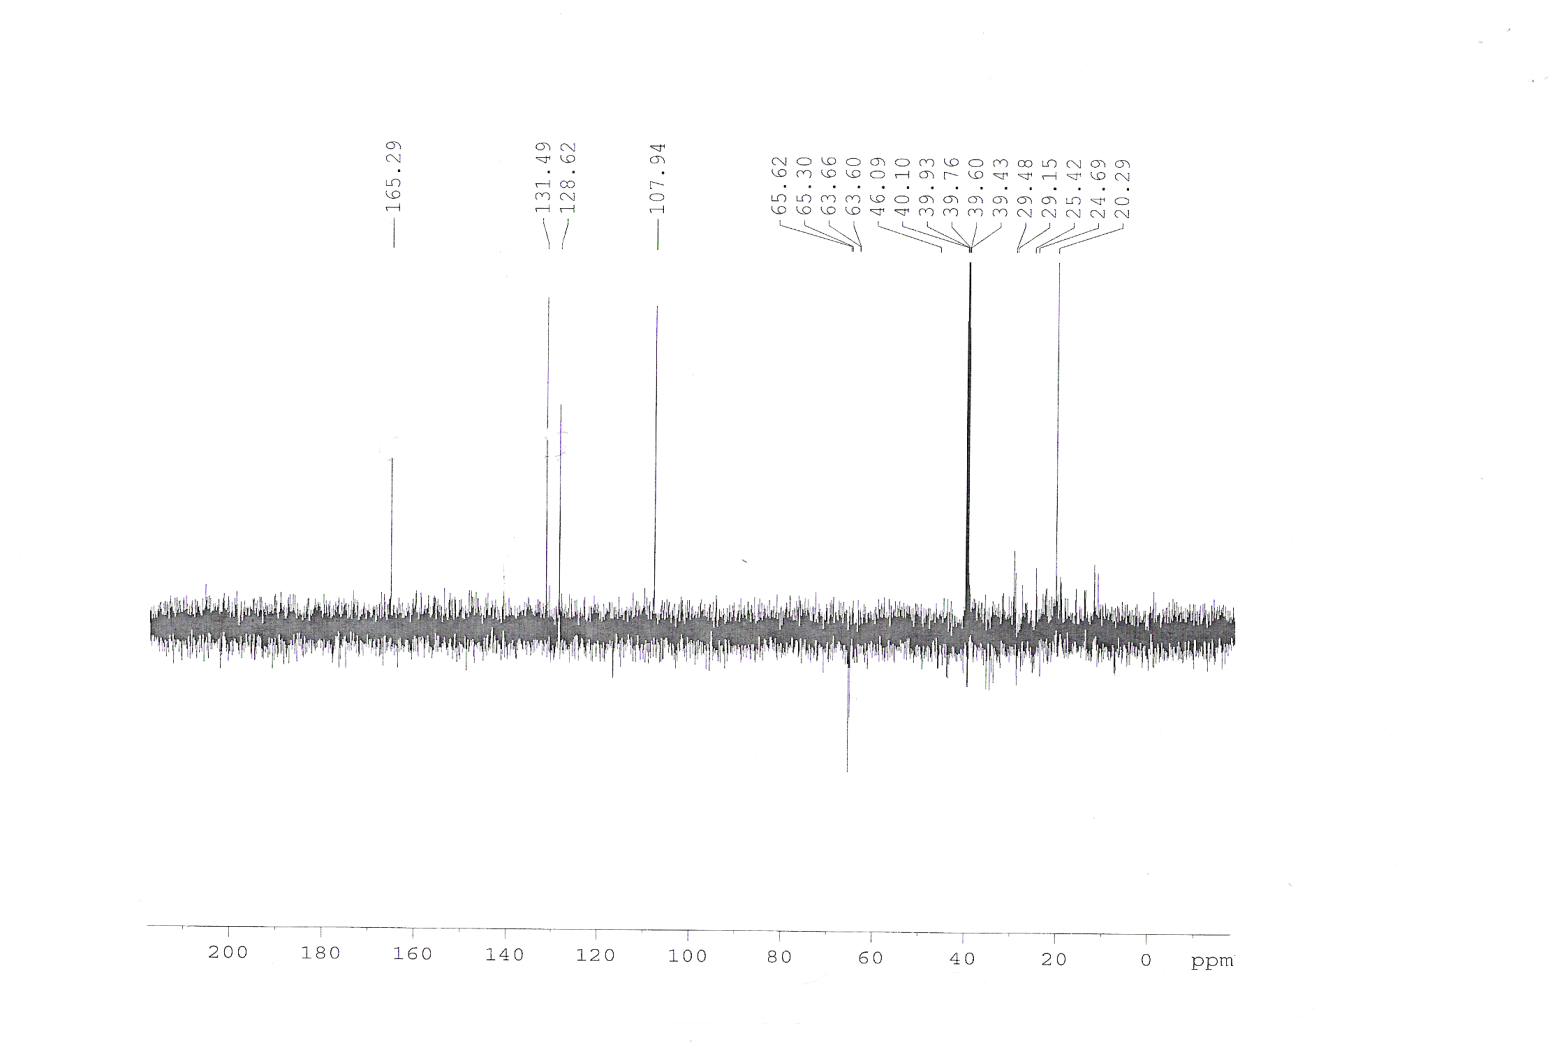
**

**Fig ( 4 ): Dept.135 NMR Spectrum of compound (5)…Solvent DMSO**

**
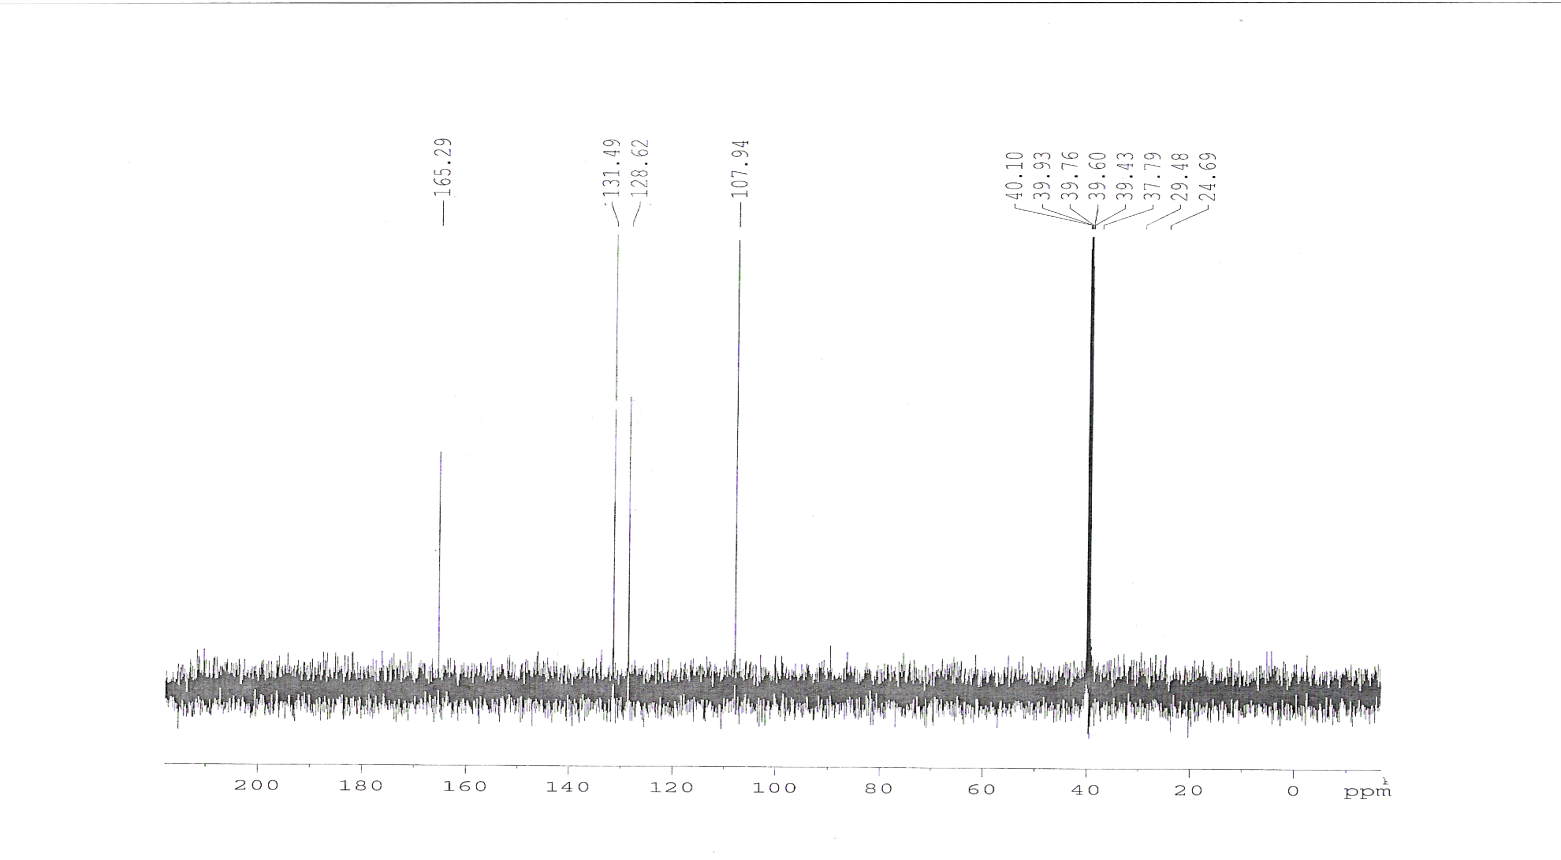
**

**Fig ( 5 ): Dept.90 13C NMR Spectrum of compound (5)…Solvent DMSO**

**
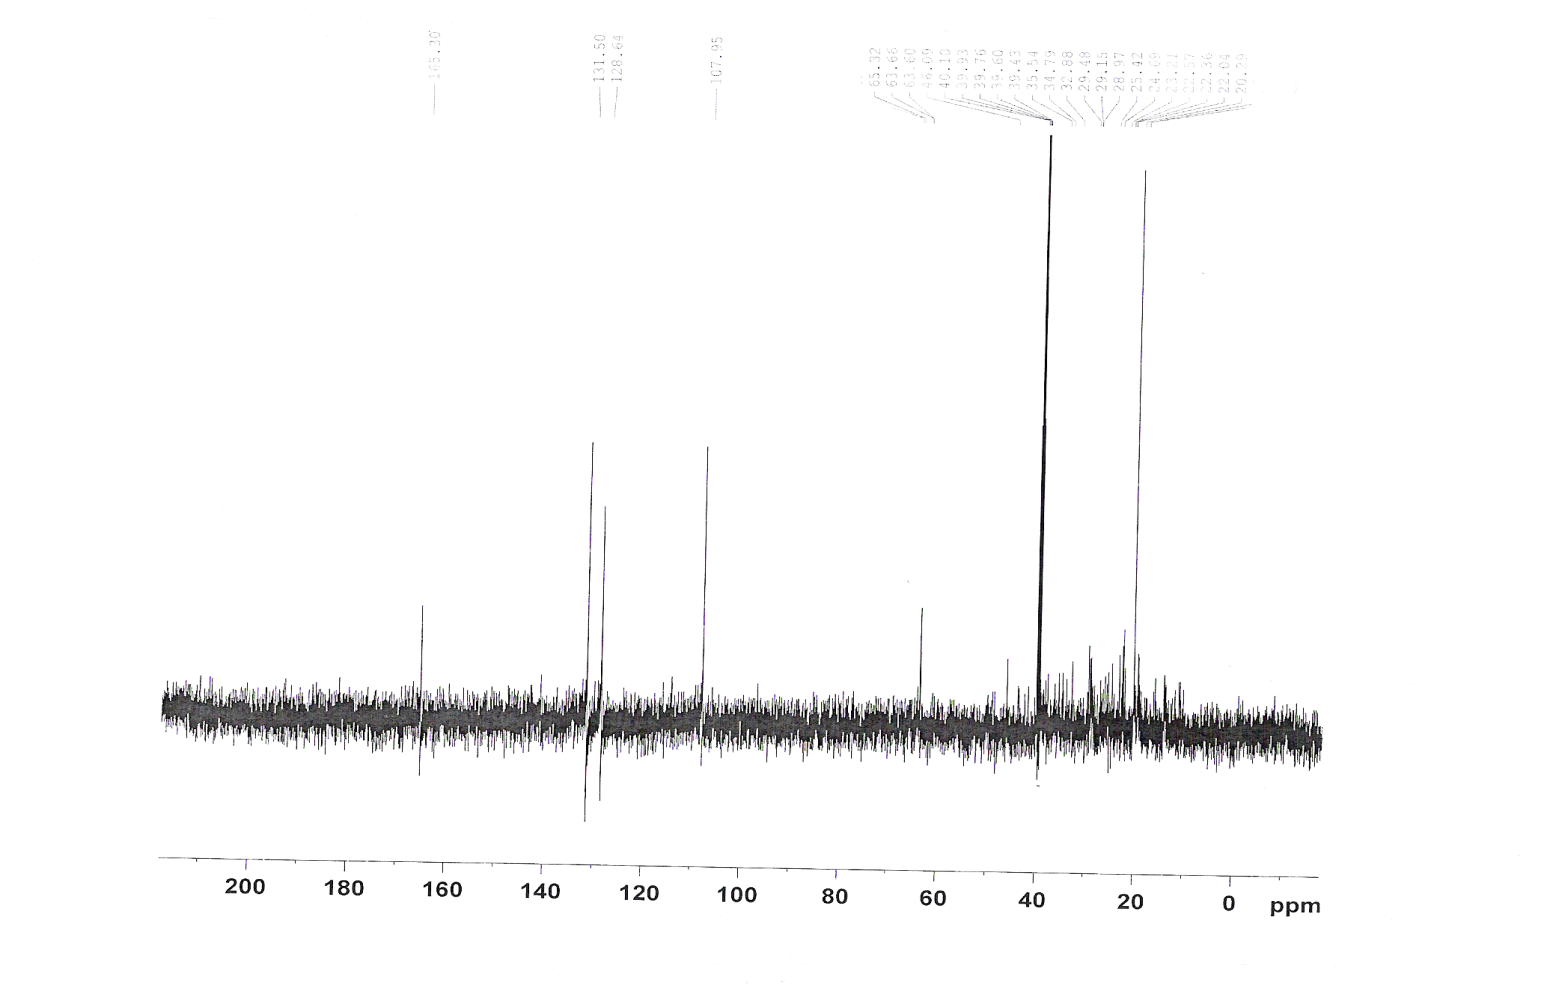
**

**Fig ( 6 ): Dept.45 13C NMR Spectrum of compound (5)…Solvent DMSO**


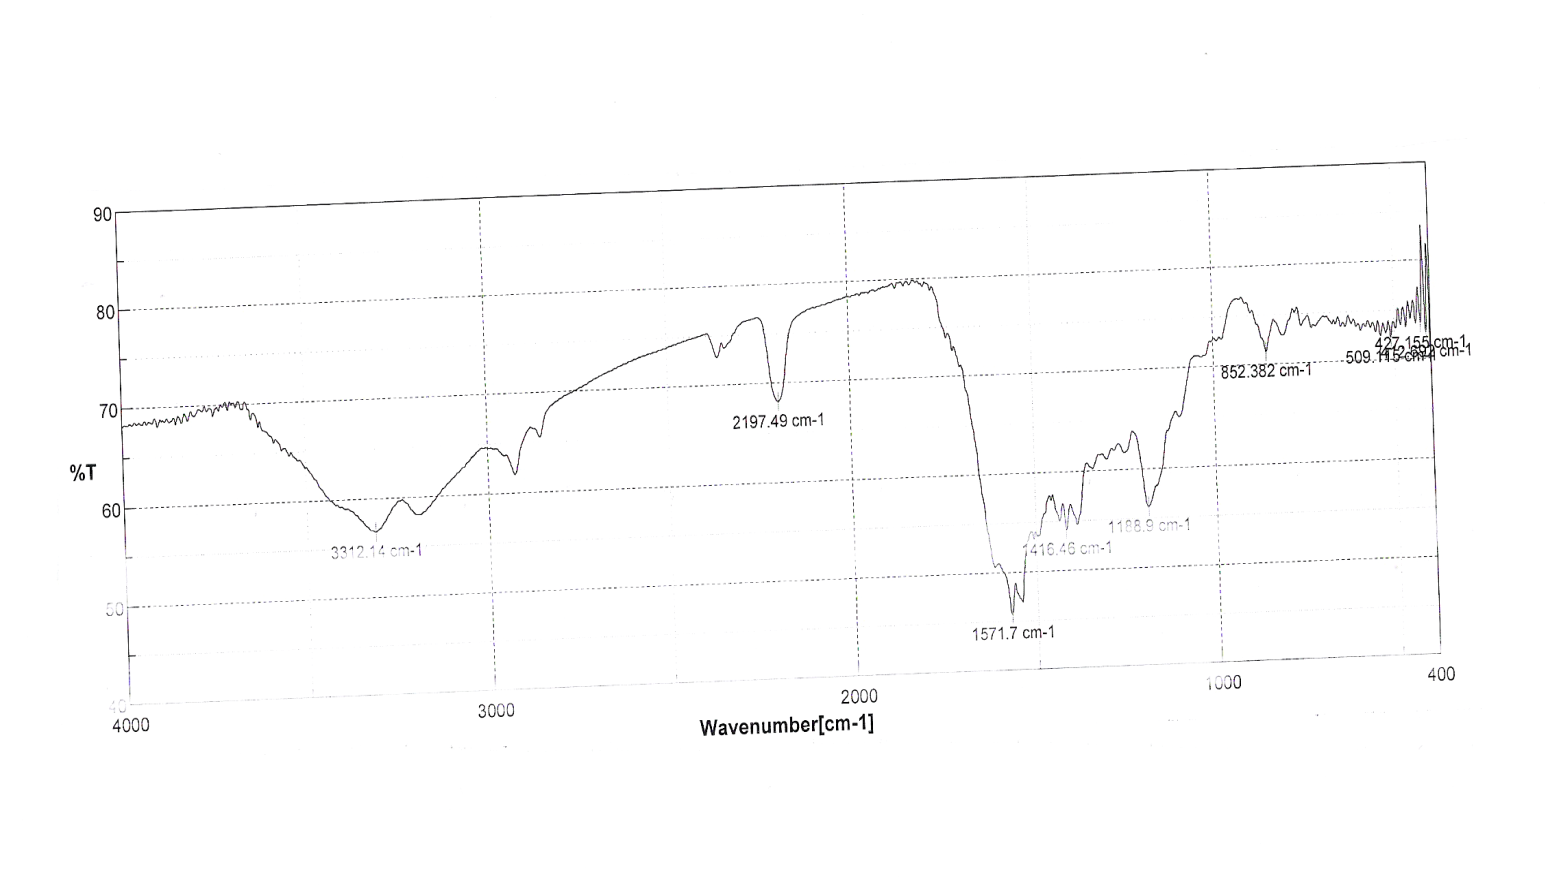


**Fig ( 7 ): IR Spectrum of Compound (7)**


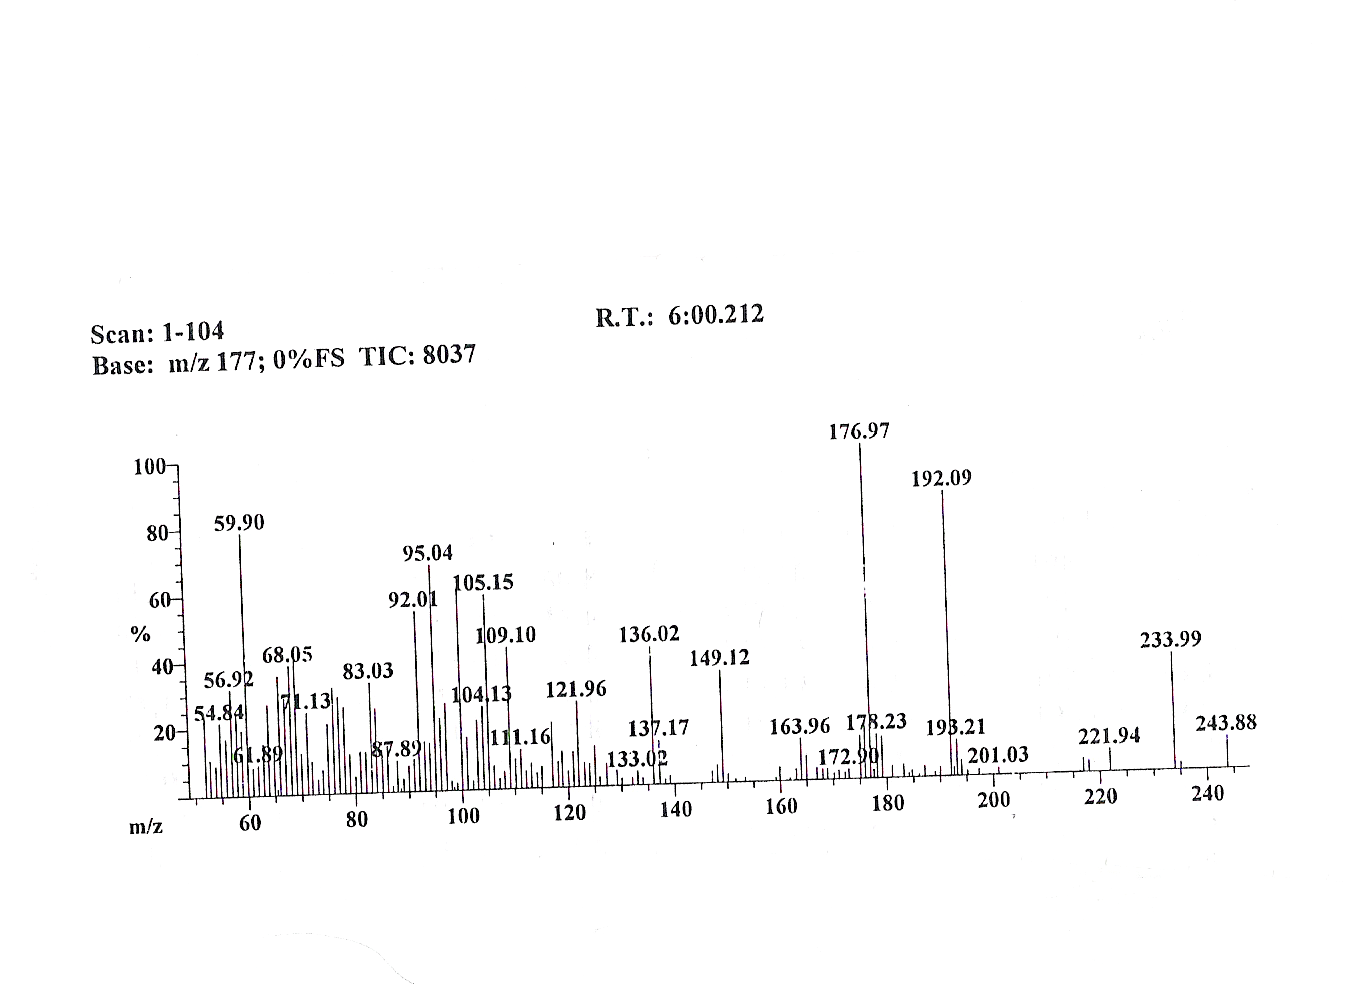


**Fig ( 8 ): Mass spectrum of Compound (7)**

**
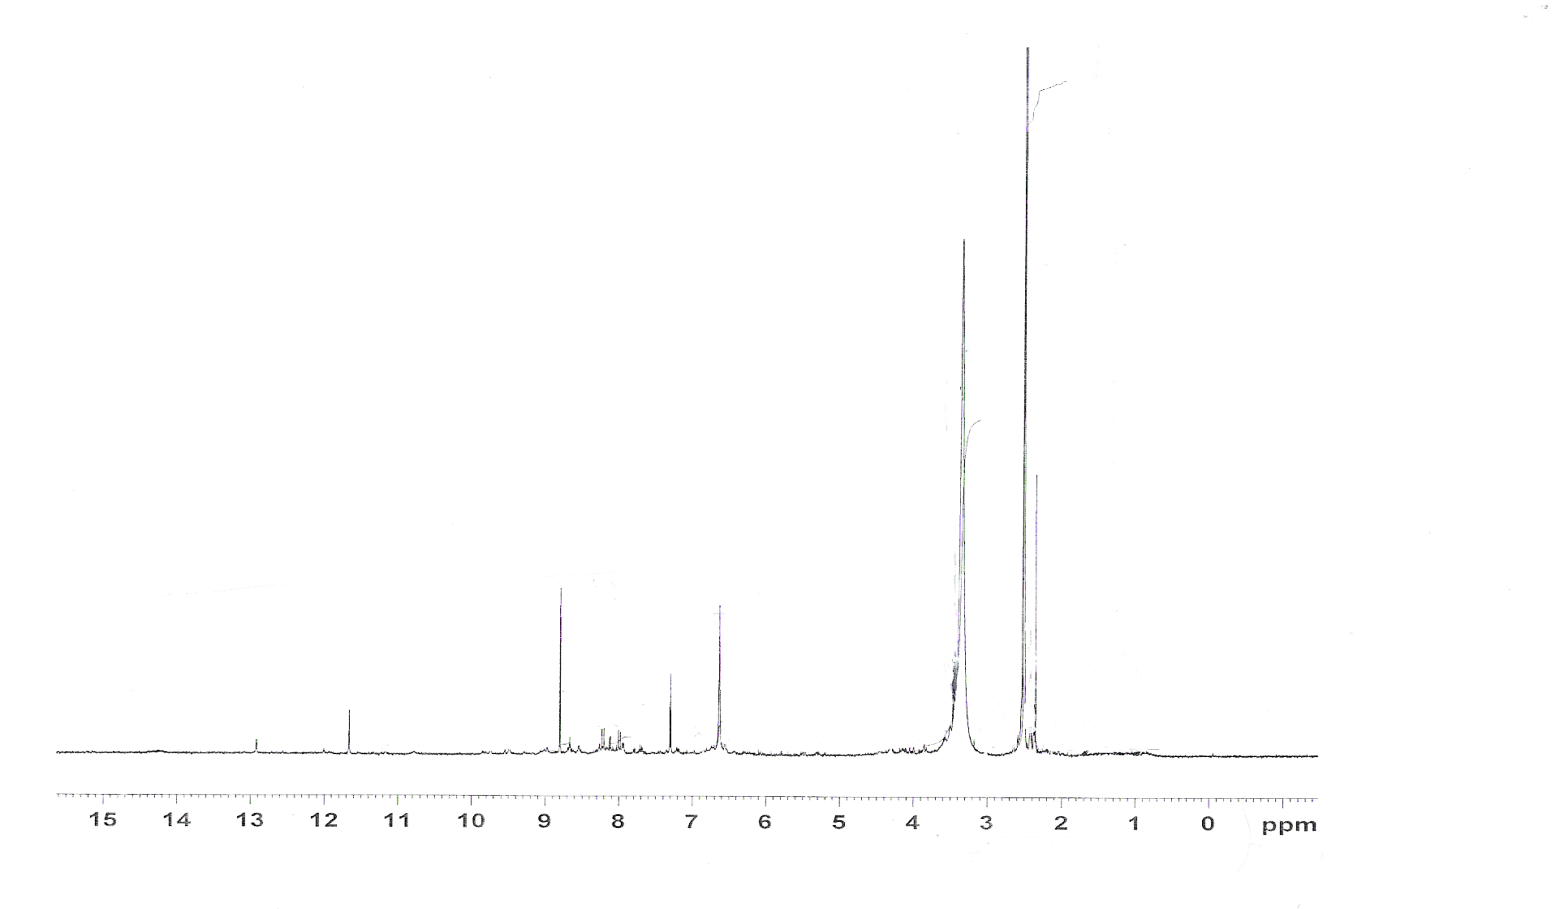
**

**Fig ( 9 ): 1H NMR Spectrum of Compound (7)…..Solvent DMSO**

**
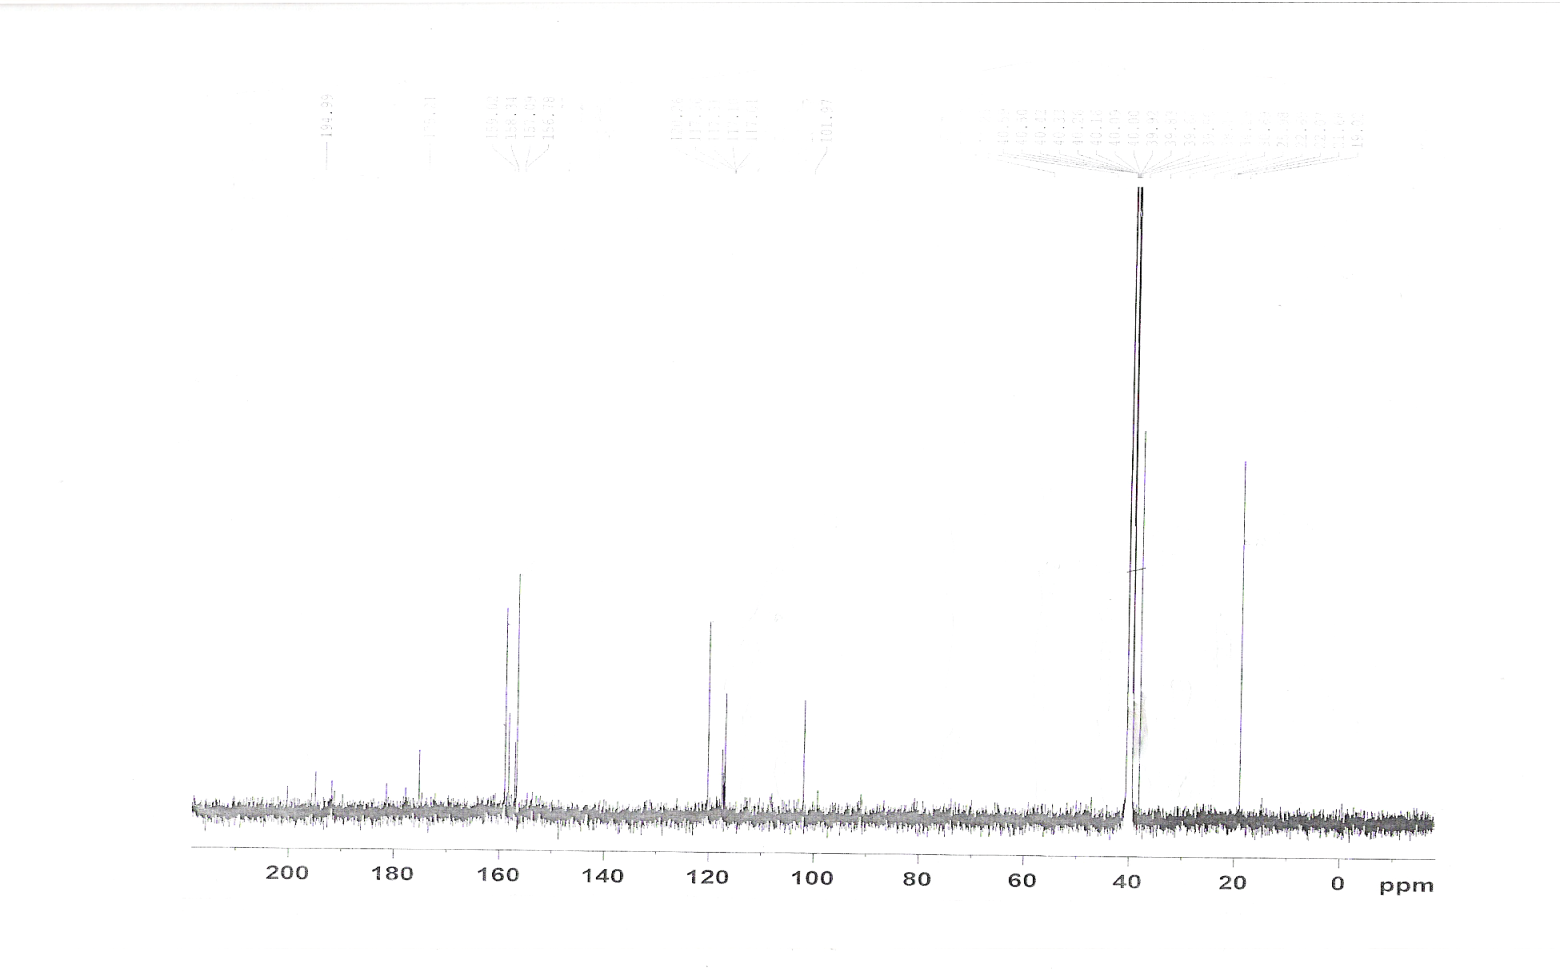
**

**Fig ( 10 ): 13C NMR Spectrum of Compound (7)…….Solvent DMSO**

**
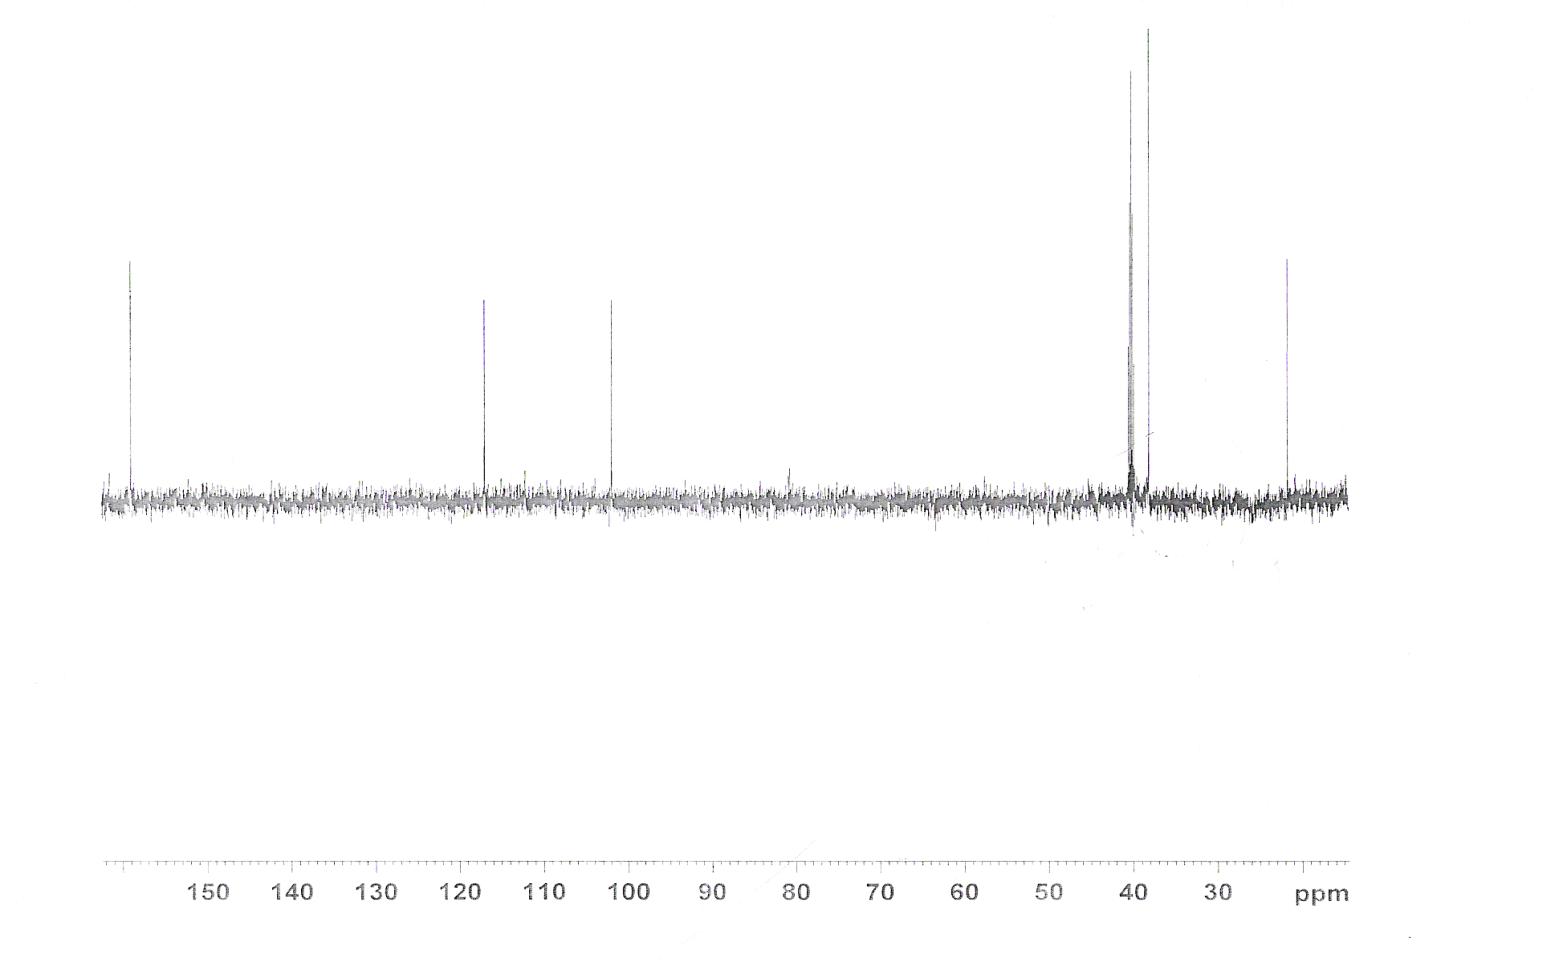
**

**Fig ( 11 ): Dept. 135 13C NMR Spectrum of Compound (7)…….Solvent DMSO**

**
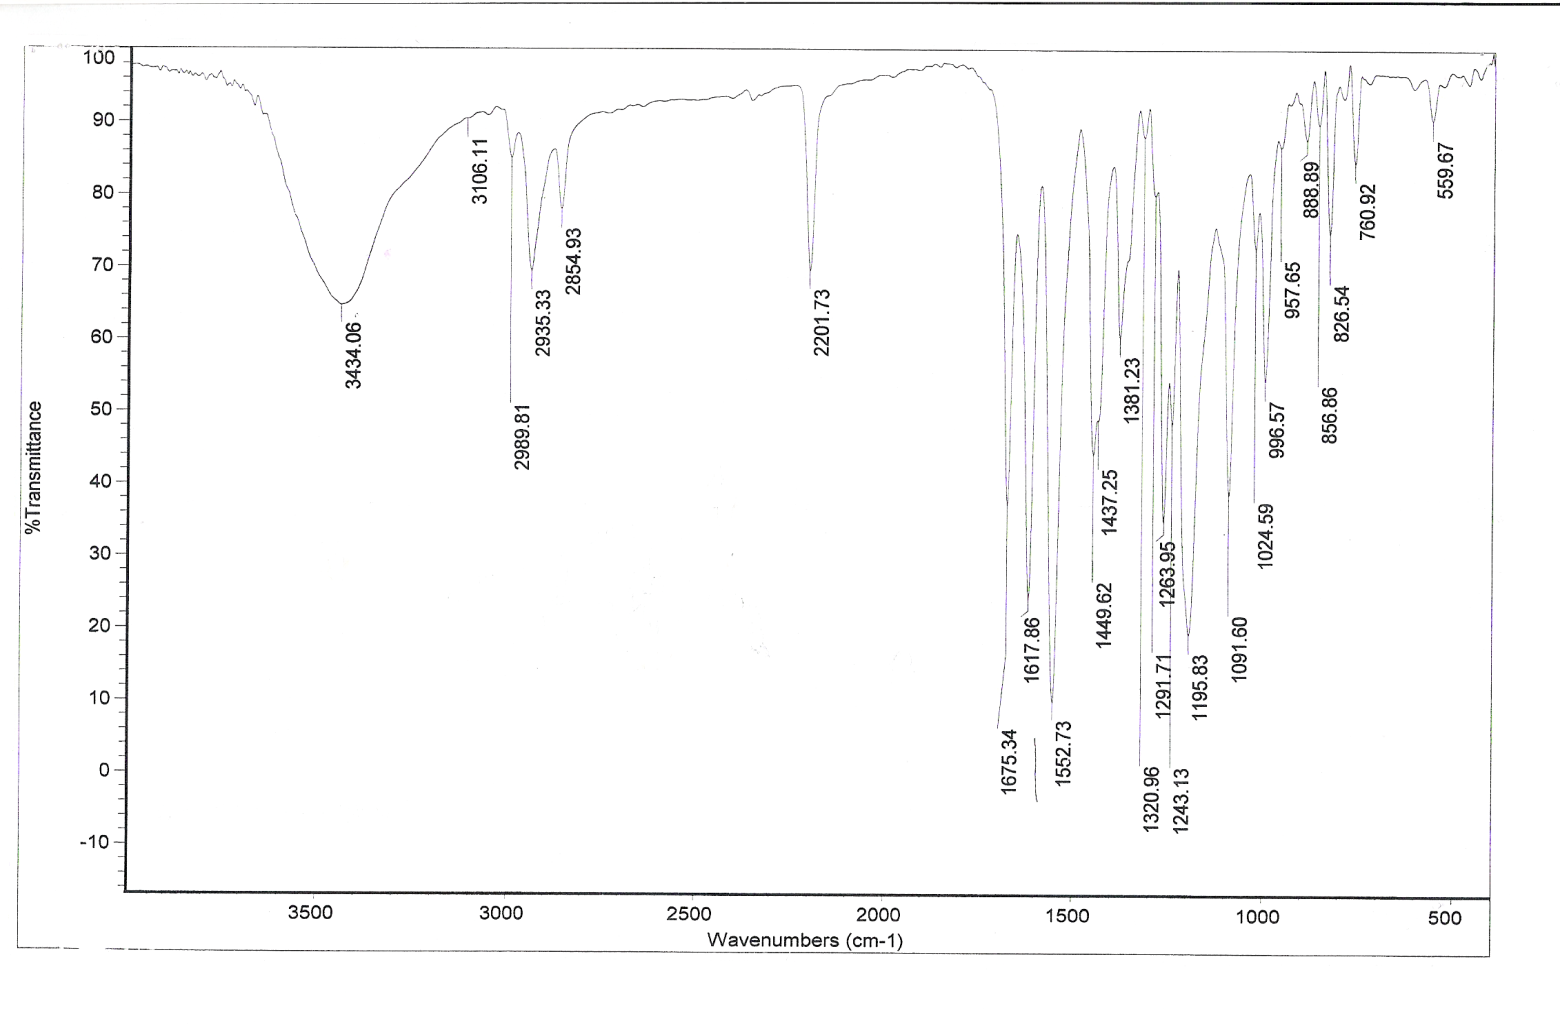
**

**Fig ( 12 ): IR Spectrum of Compound (9)**

**
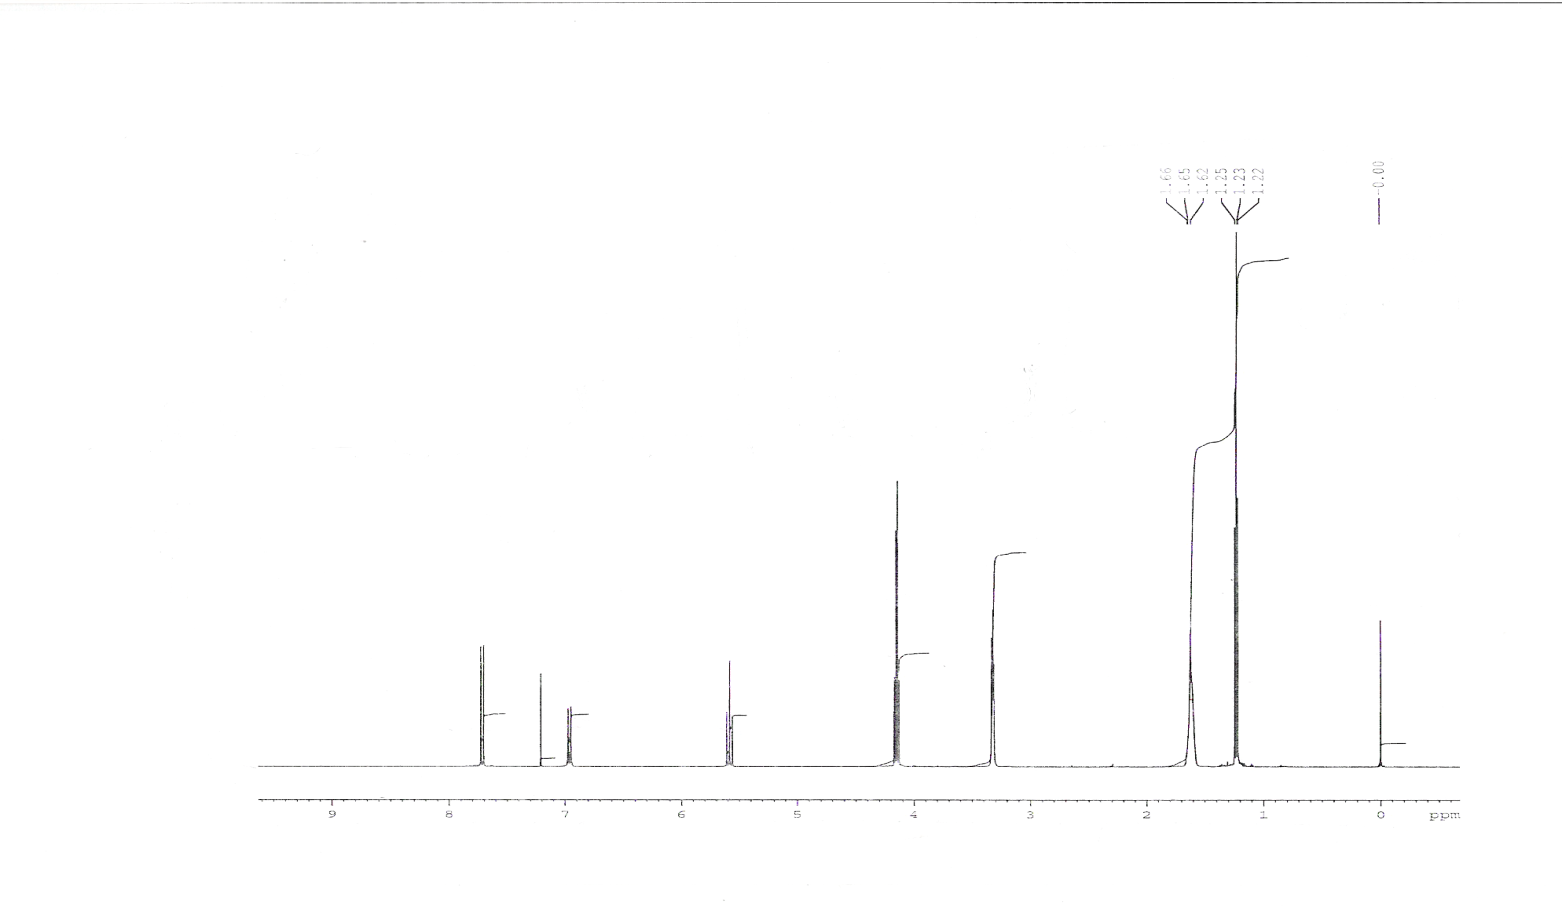
**

**Fig ( 13 ): 1H NMR Spectrum of Compound (9) ….Solvent CDCl3**

**
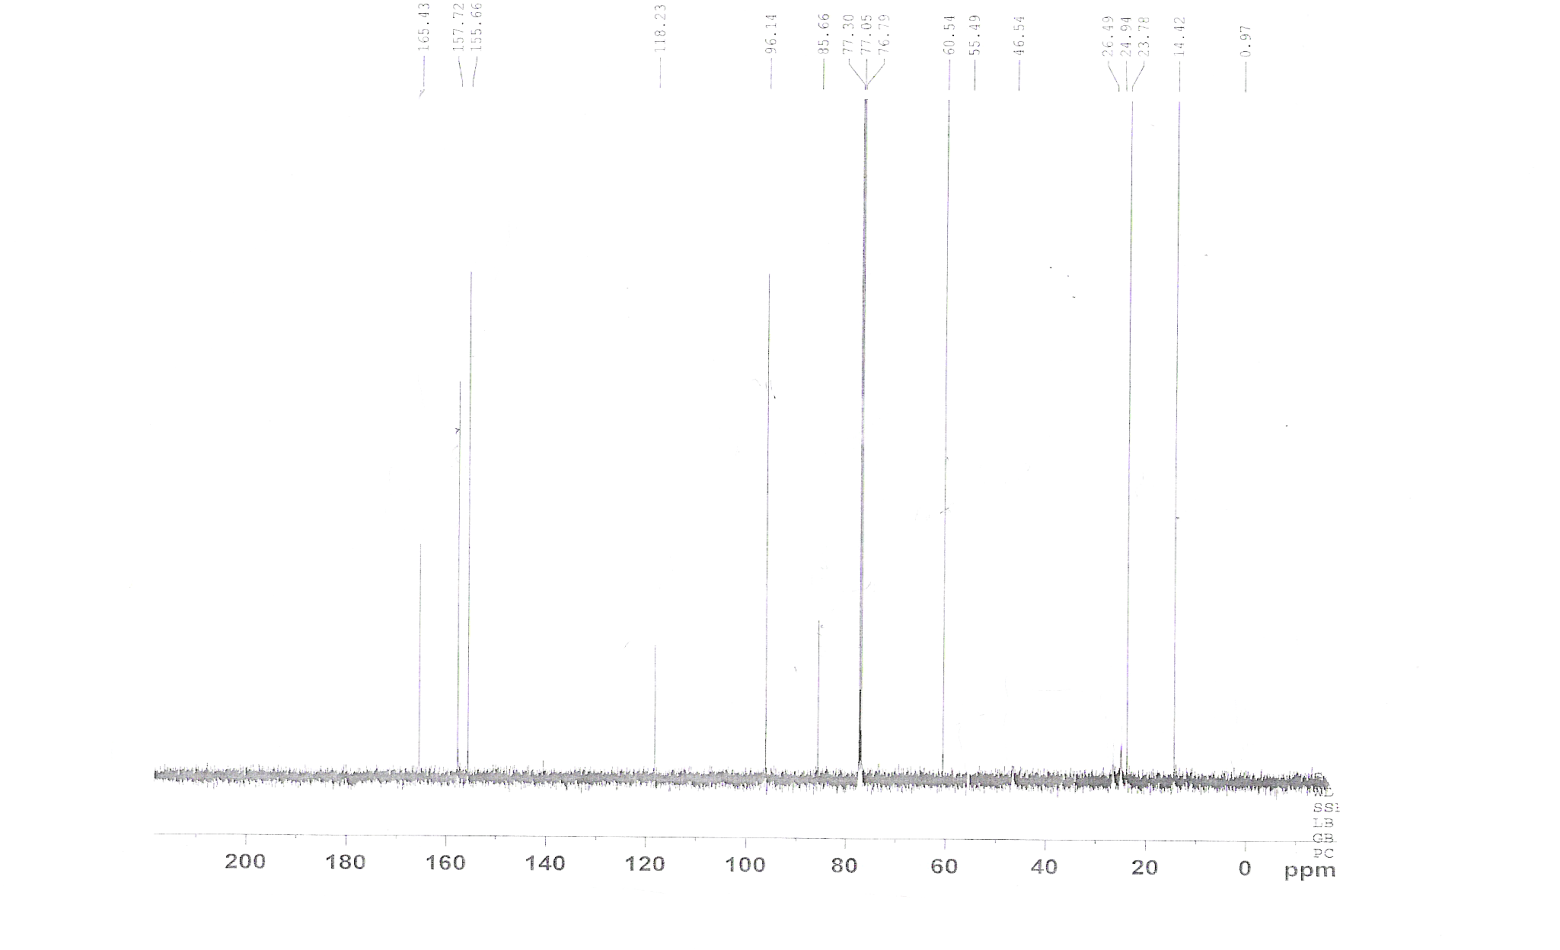
**

**Fig ( 14 ): 13C NMR Spectrum of Compound (9)…….Solvent CDCl3**

**
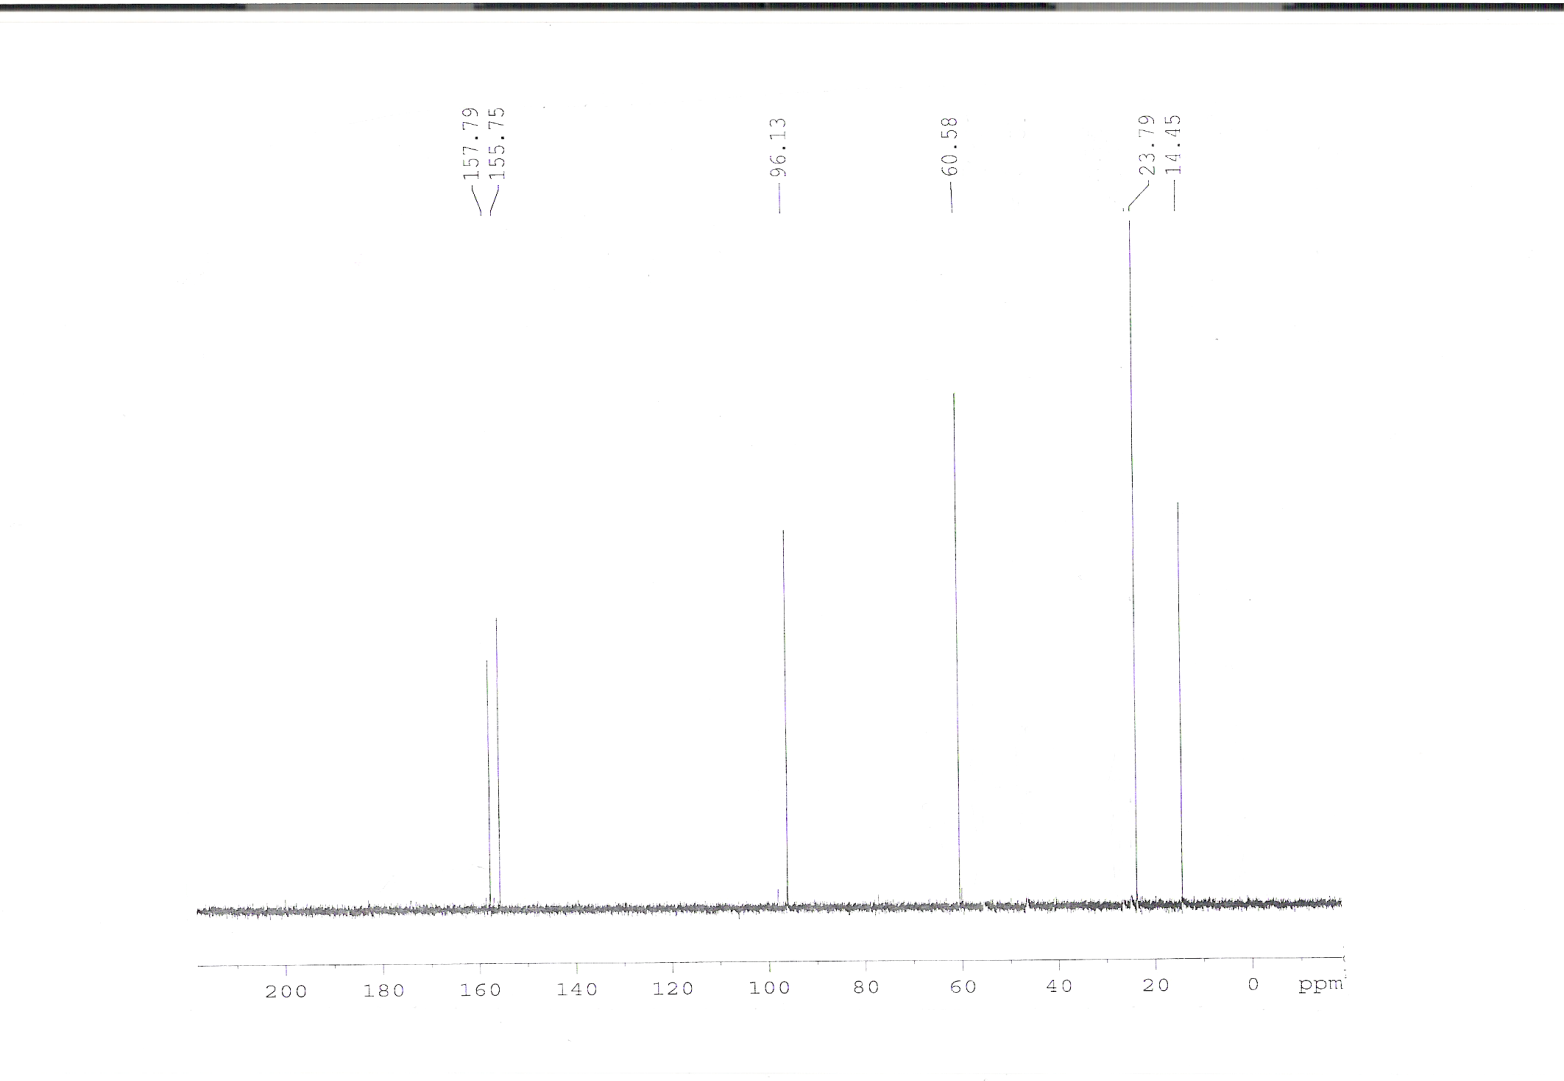
**

**Fig ( 15 ): Dept. 45 13C NMR Spectrum of Compound (9)…….Solvent CDCl3**

**
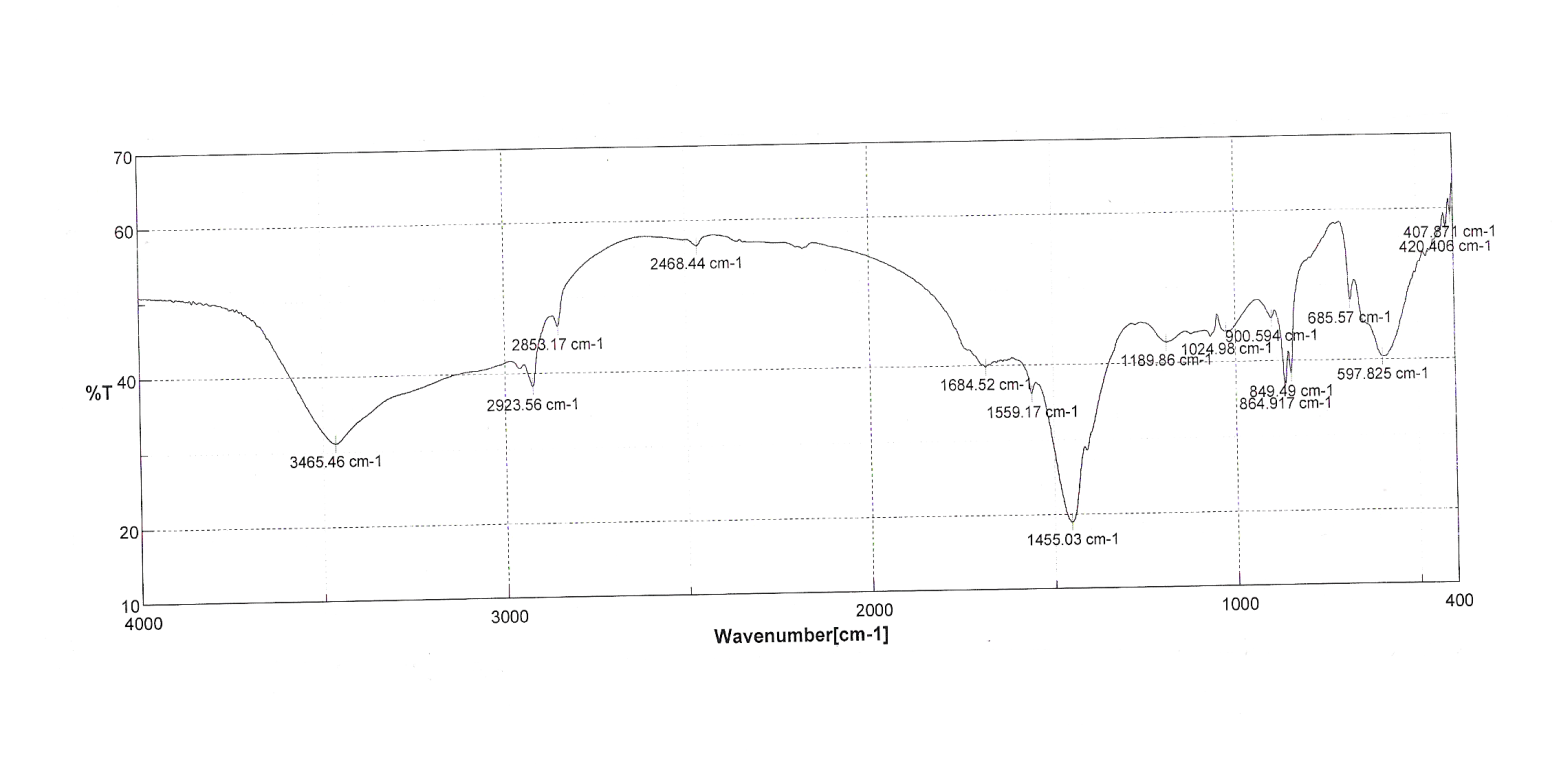
**

**Fig ( 16 ): IR Spectrum of Compound (10)**

**
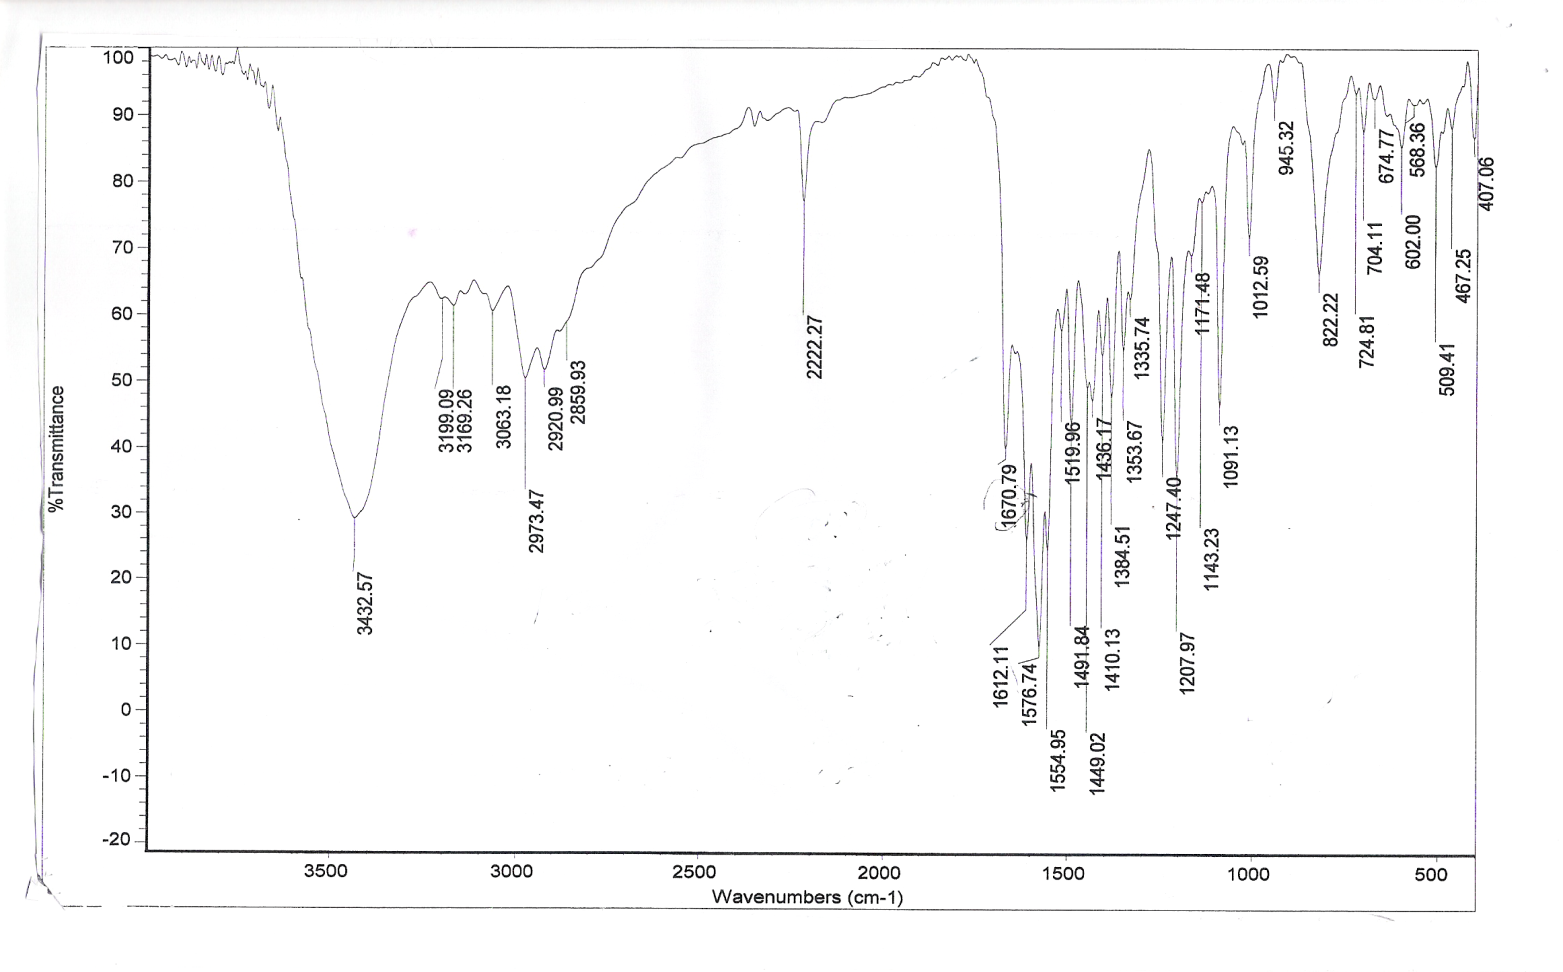
**

**Fig ( 17 ):IR Spectrum of Compound 15**

**
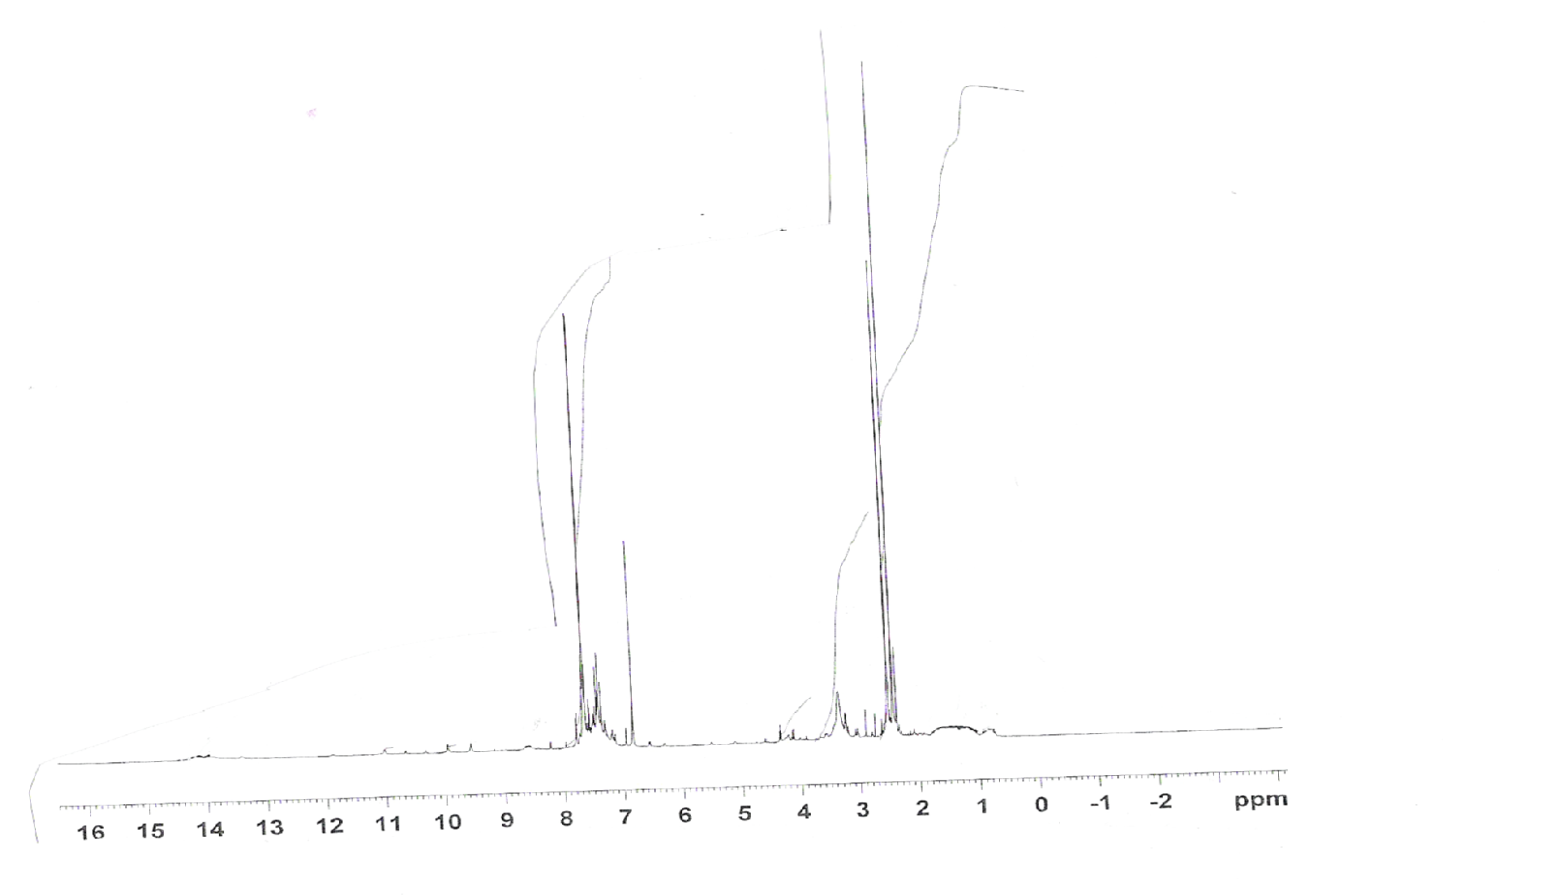
**

**Fig ( 18 ): 1H NMR Spectrum of Compound 15…….Solvent DMSO**

**
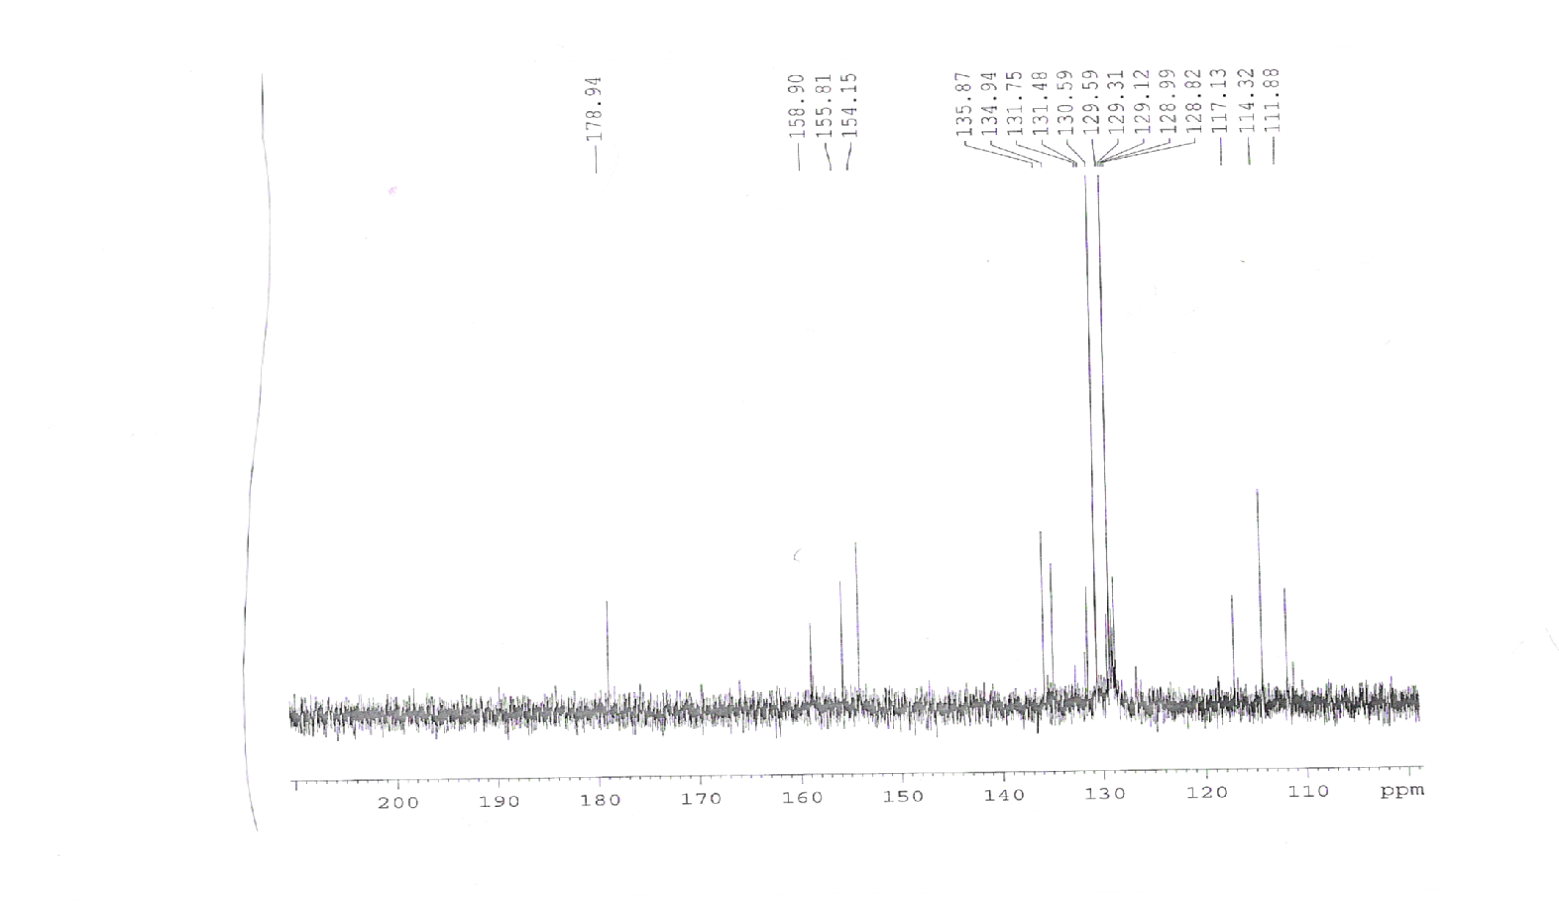
**

**Fig ( 19):13C NMR Spectrum of Compound 15…….Solvent DMSO**

**
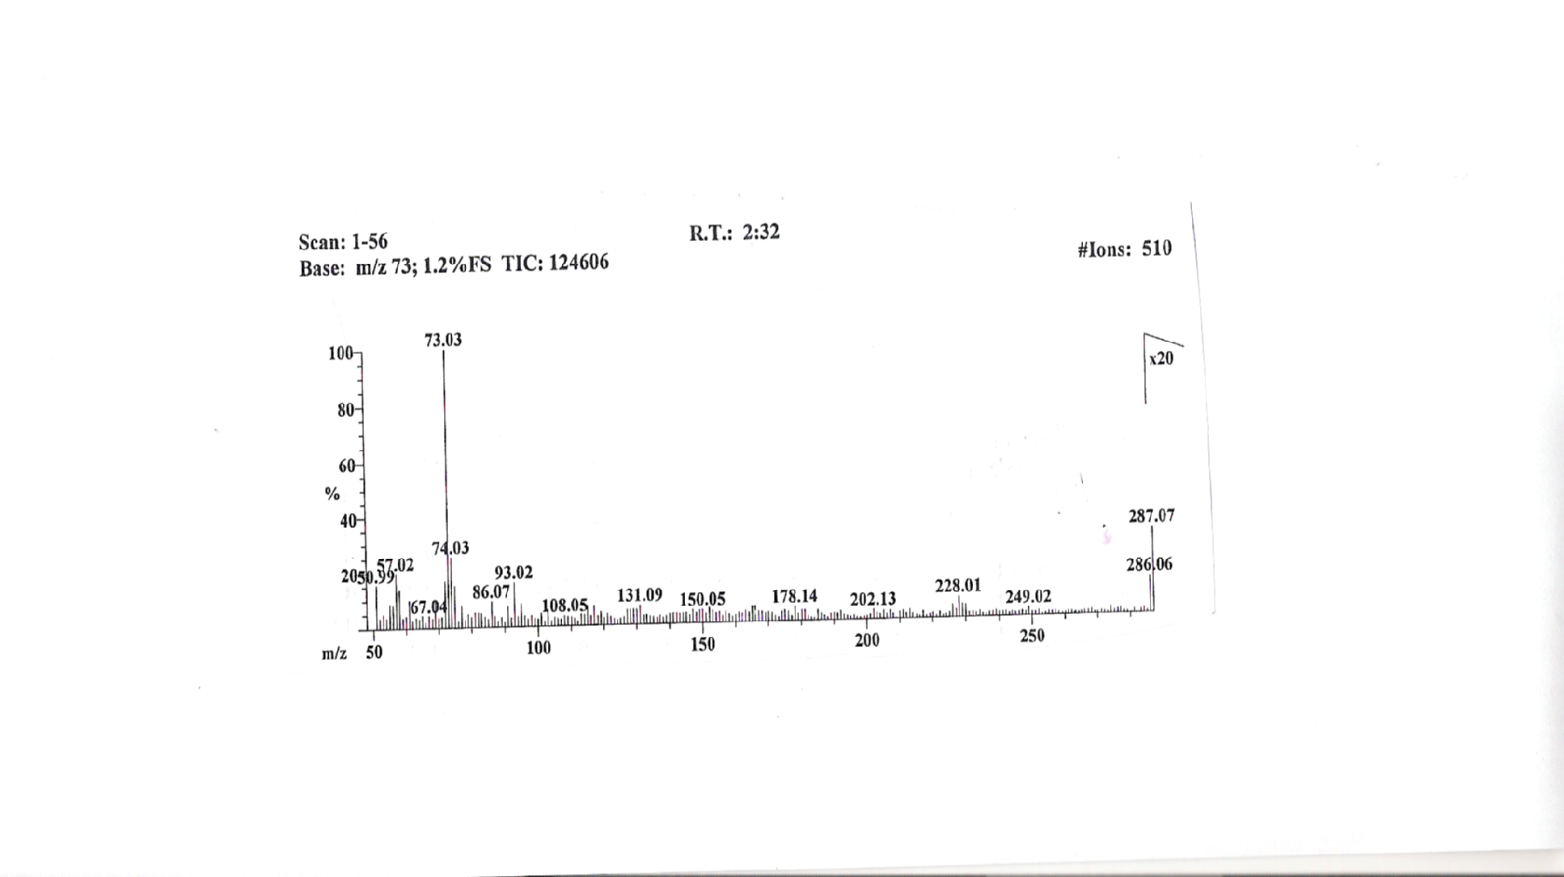
**

**Fig ( 20 ): Mass Spectrum of Compound 17**

**
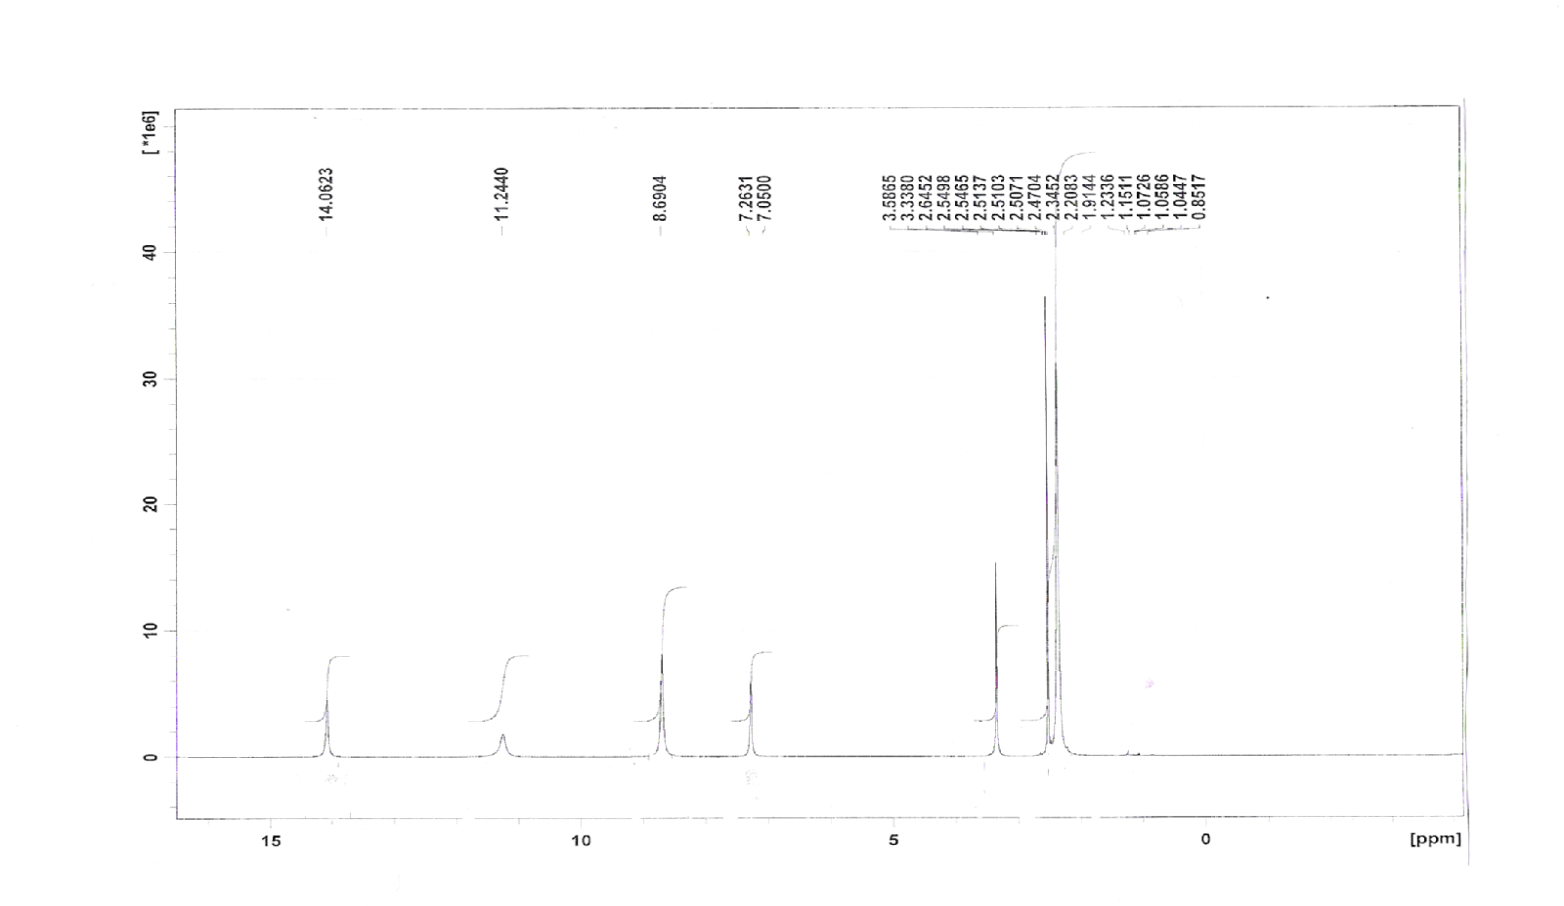
**

**Fig ( 21 ): 1H NMR Spectrum of Compound 17…….Solvent DMSO**

**
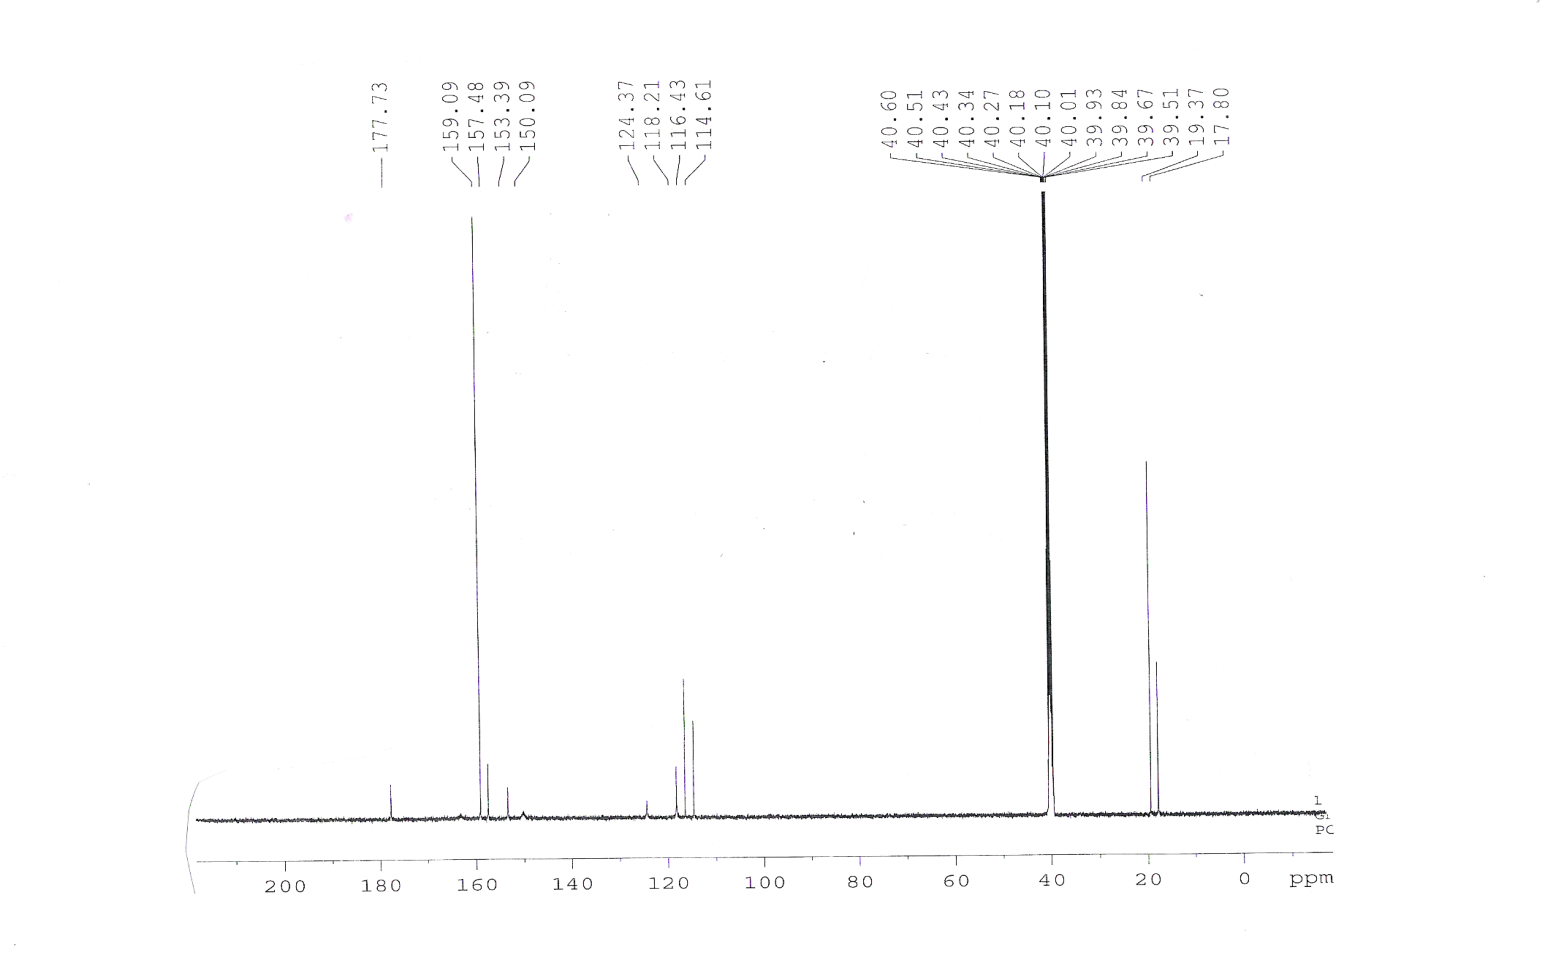
**

**Fig ( 22 ):13C NMR Spectrum of Compound 17…….Solvent DMSO**


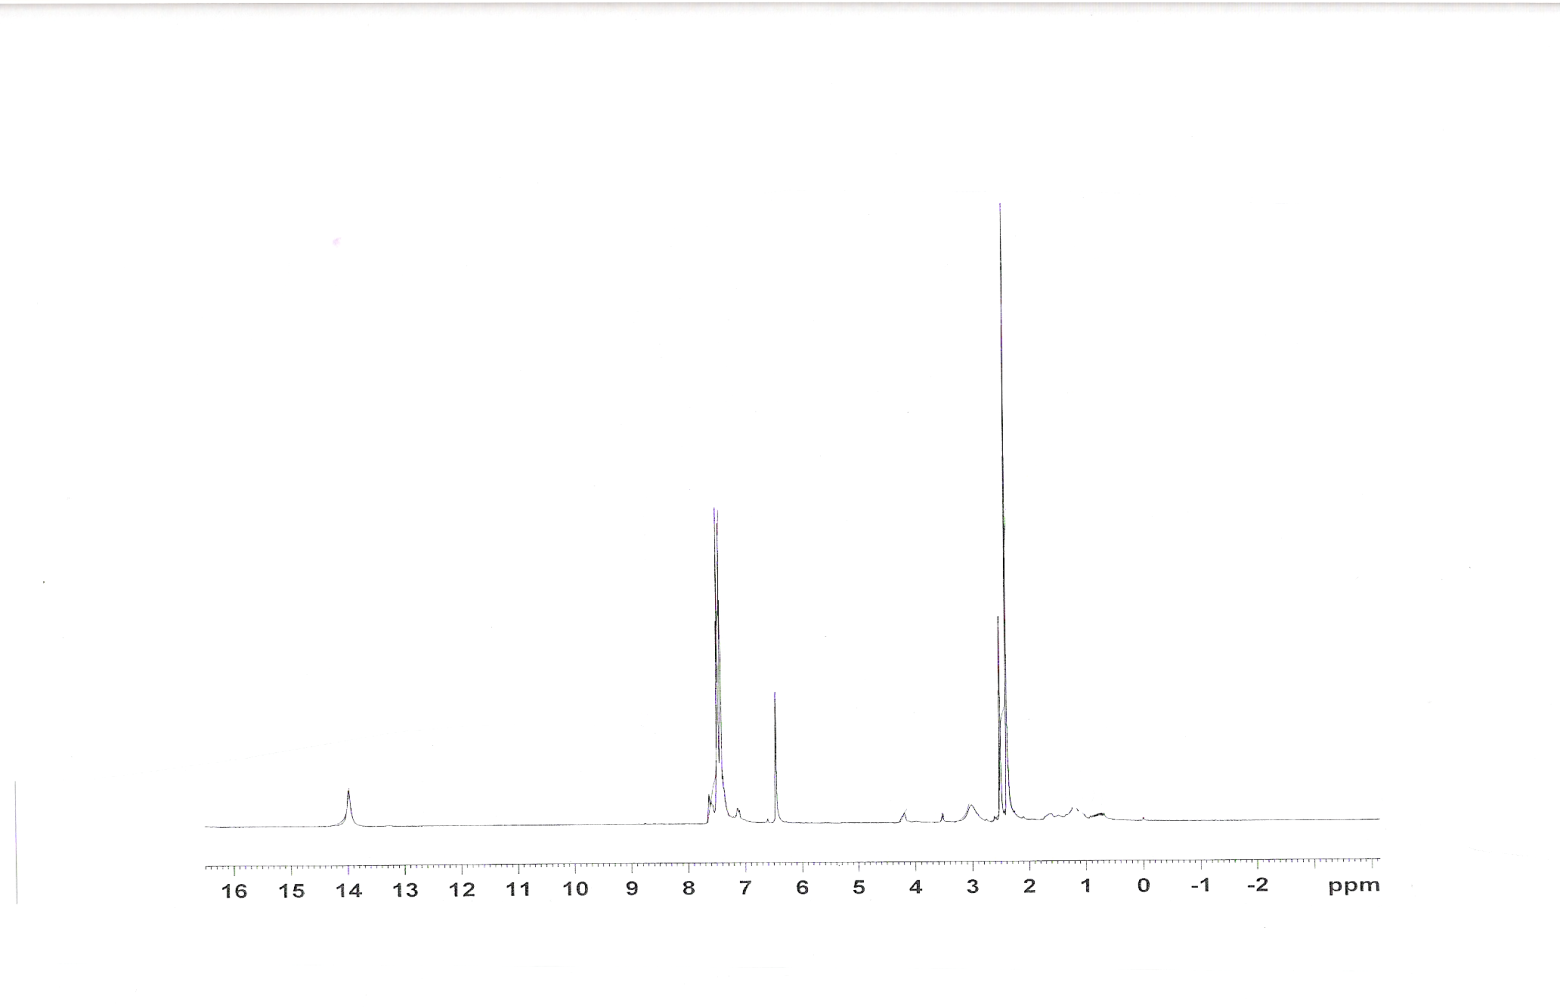


**Fig ( 23 ): 1H NMR Spectrum of Compound 18…….Solvent DMSO**


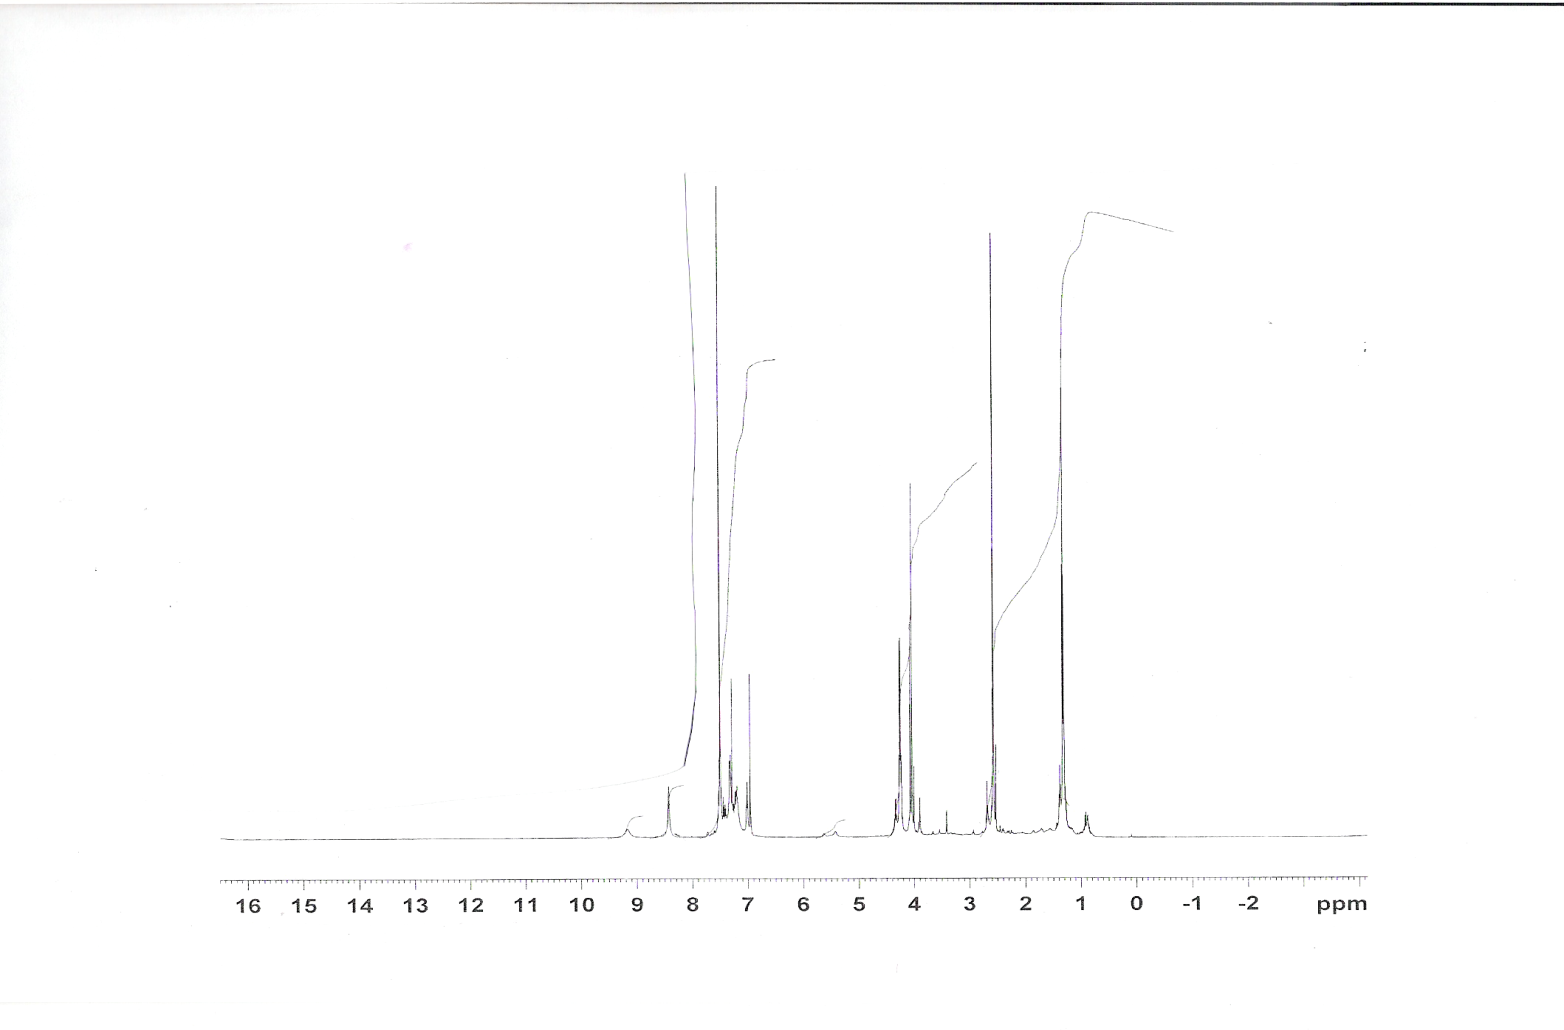


**Fig ( 24 ): 1H NMR Spectrum of Compound (19)…….Solvent CDCl3**

**
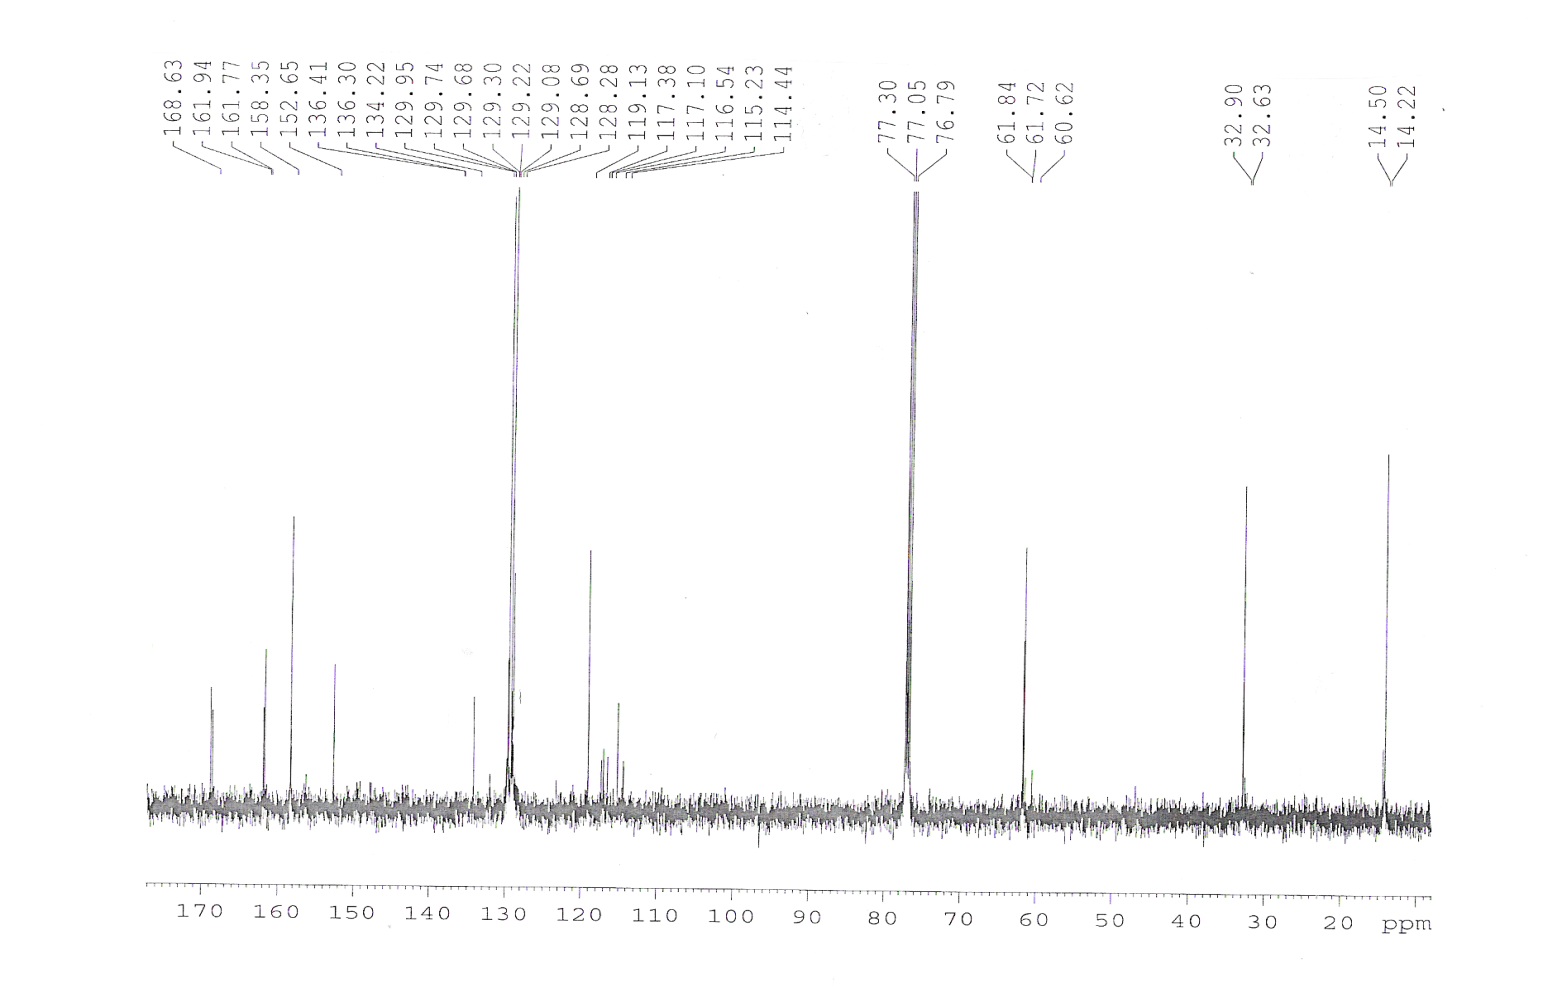
**

**Fig ( 25 ):13C NMR Spectrum of Compound (19)…….Solvent CDCL3**

**
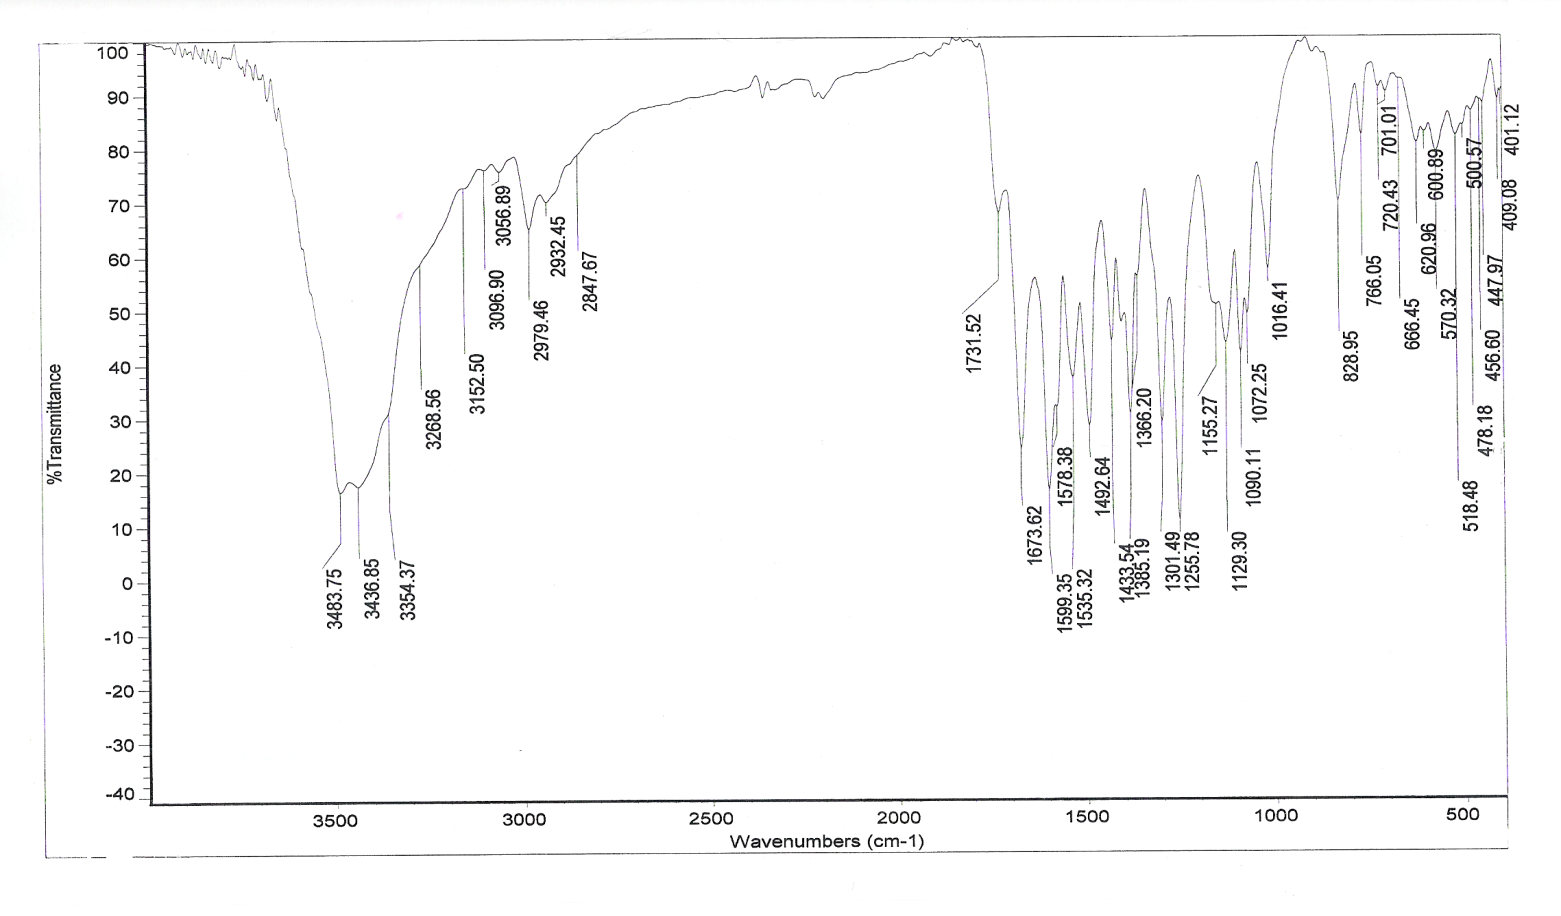
**

**Fig ( 26 ):IR Spectrum of Compound (20)**

**
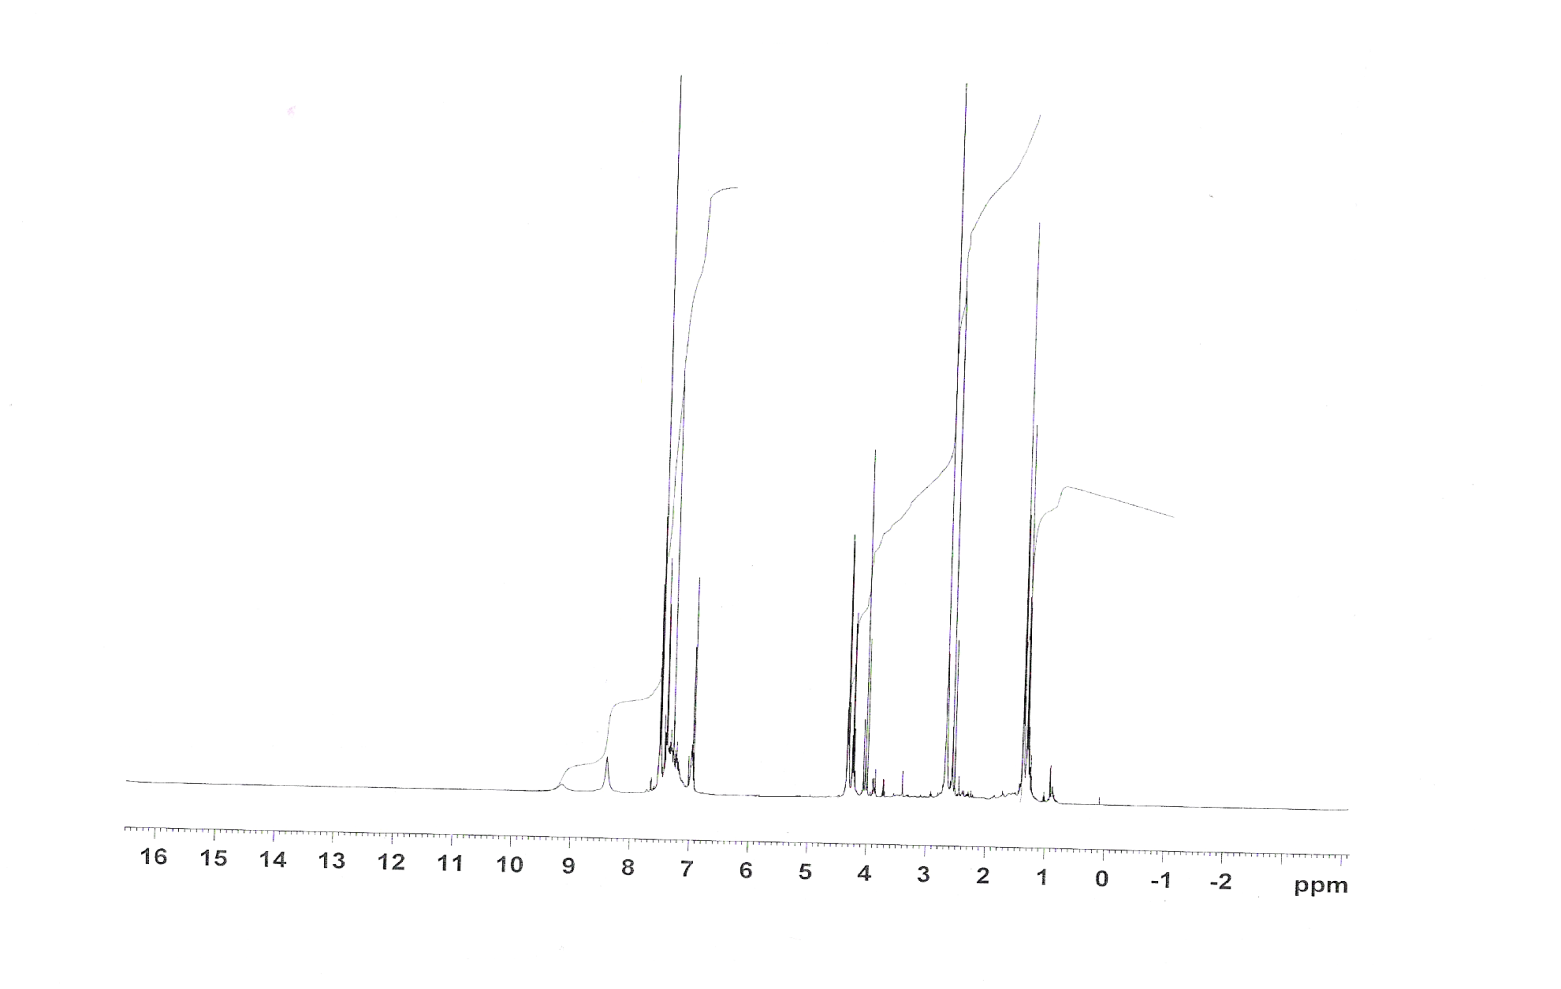
**

**Fig ( 27): 1H NMR Spectrum of Compound (20)…….Solvent CDCl3**

**
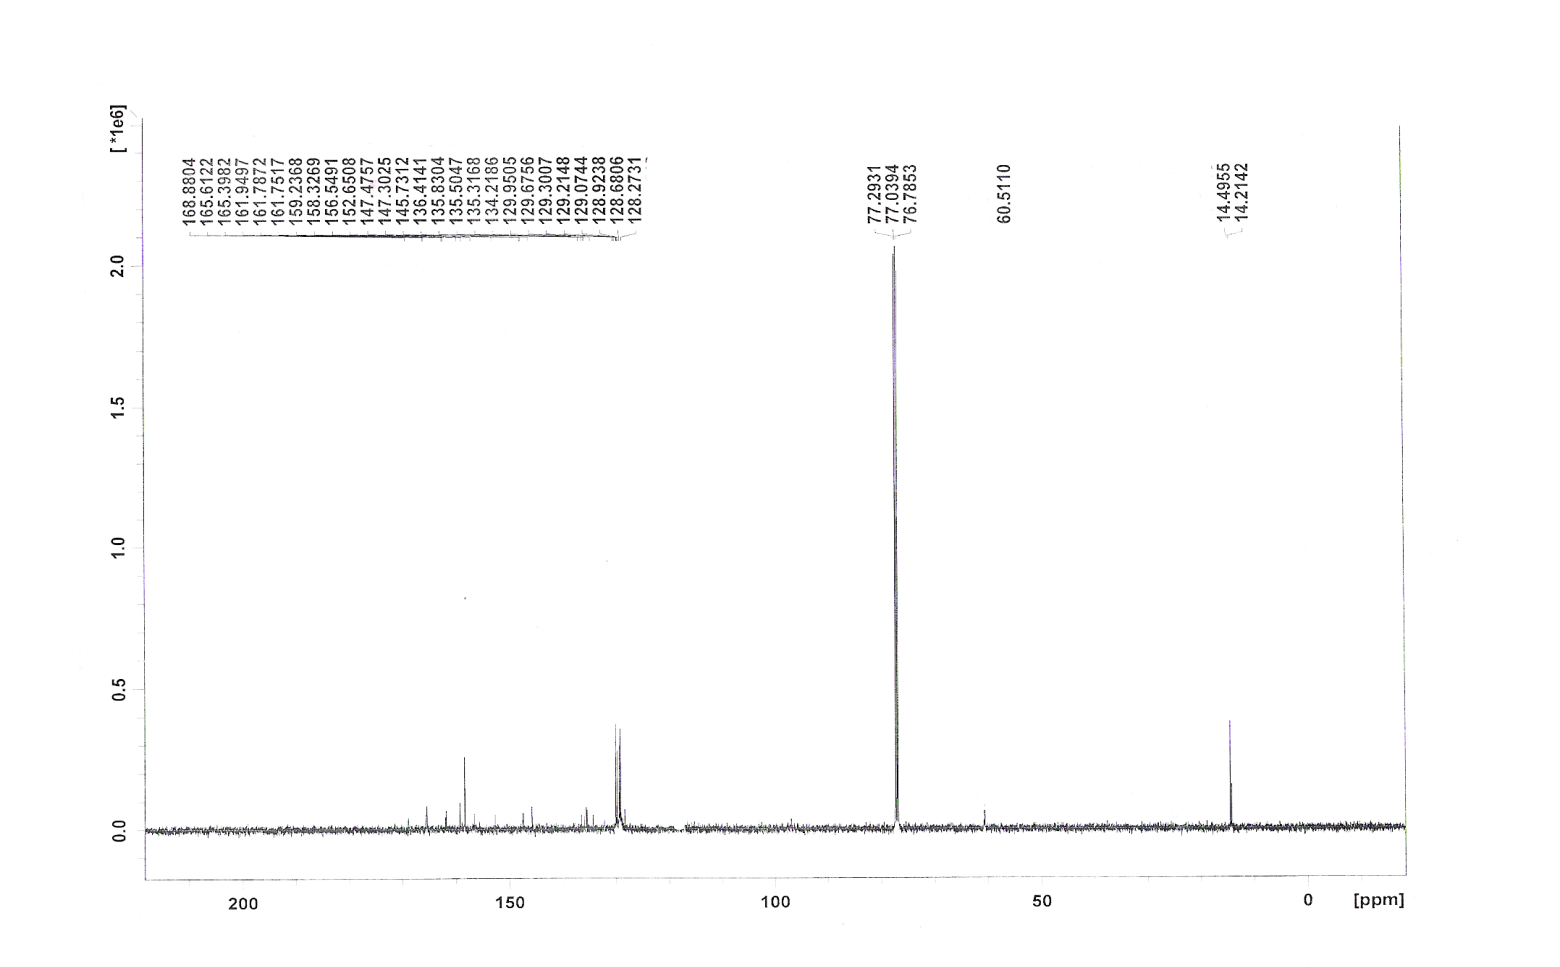
**

**Fig ( 28 ):13C NMR Spectrum of Compound (20)…….Solvent CDCl3**

**21**

**
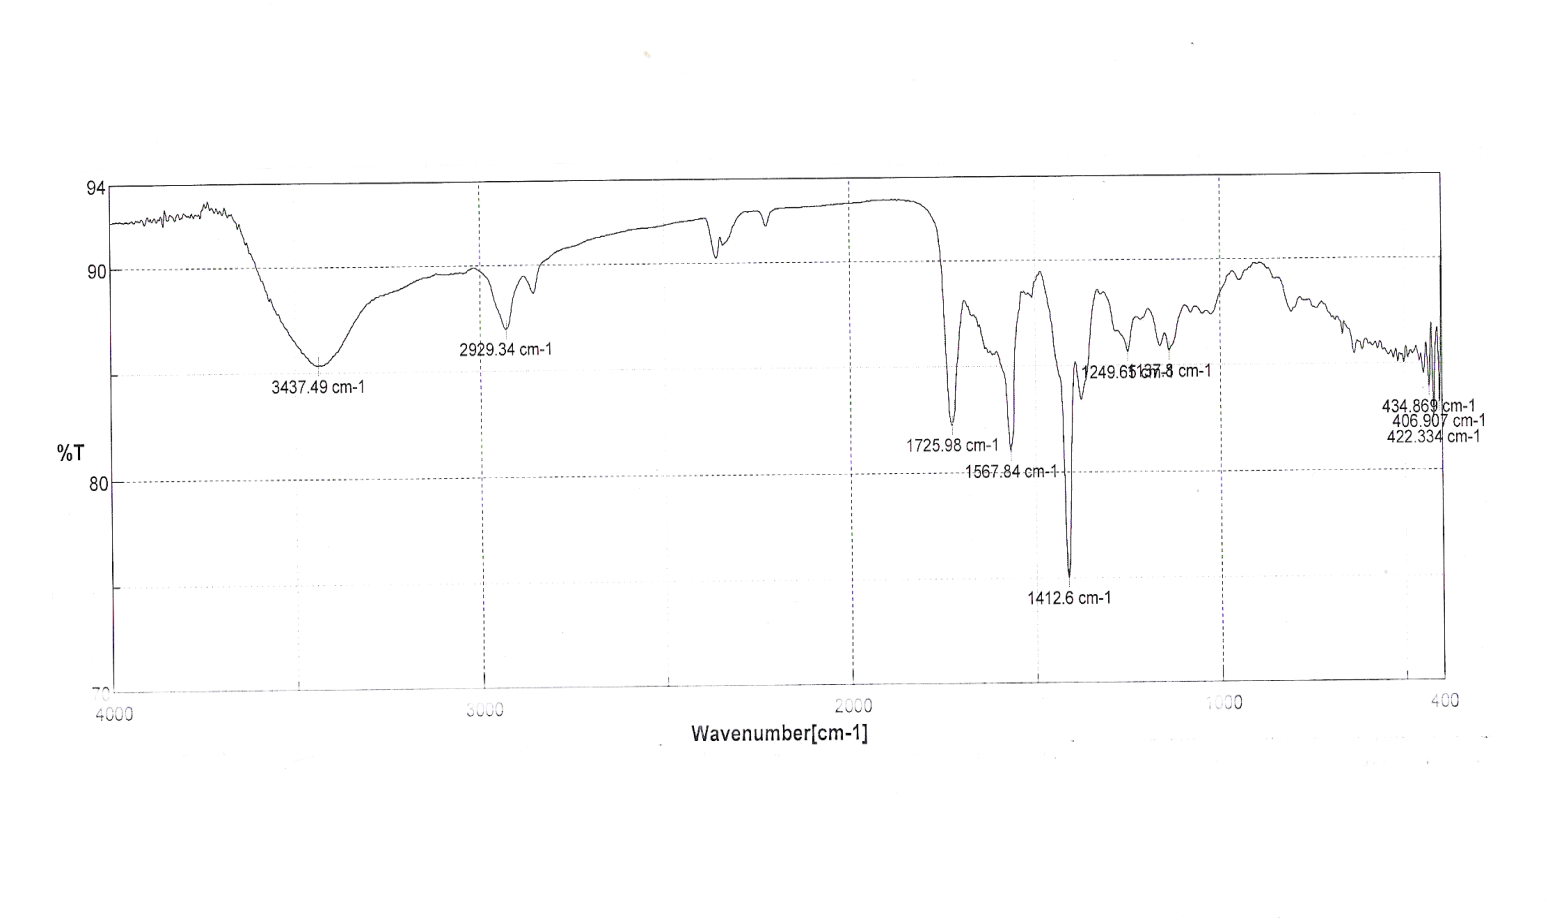
**

**Fig ( 29 ): IR Spectrum of Compound (21)**

**
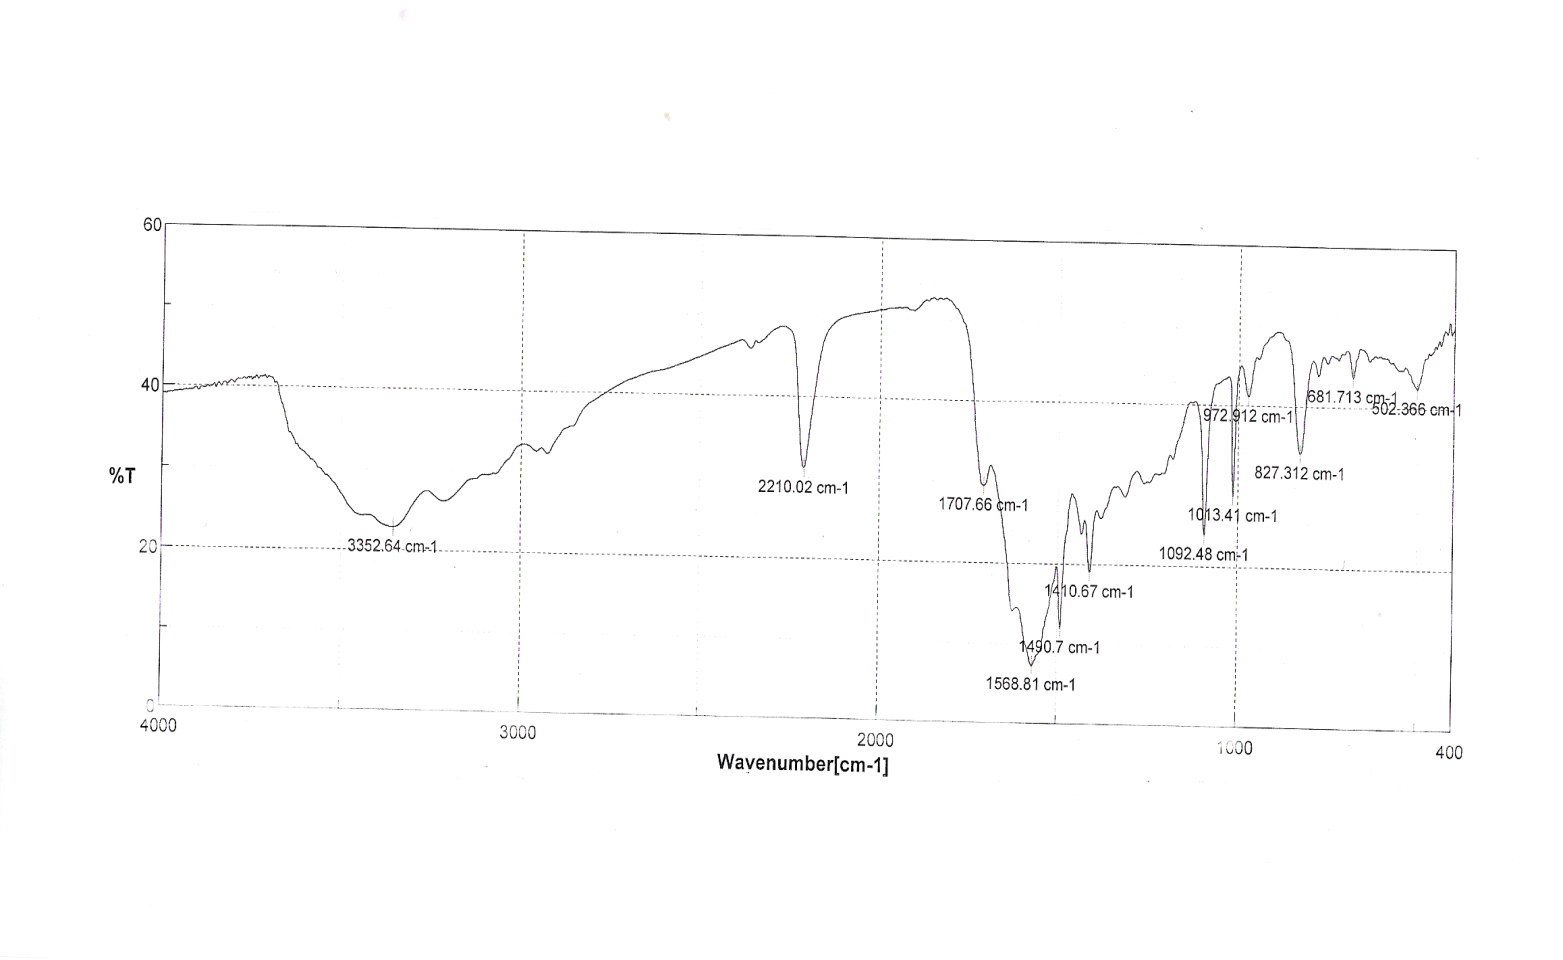
**

**Fig ( 30 ):IR Spectrum of Compound (22a)**

**
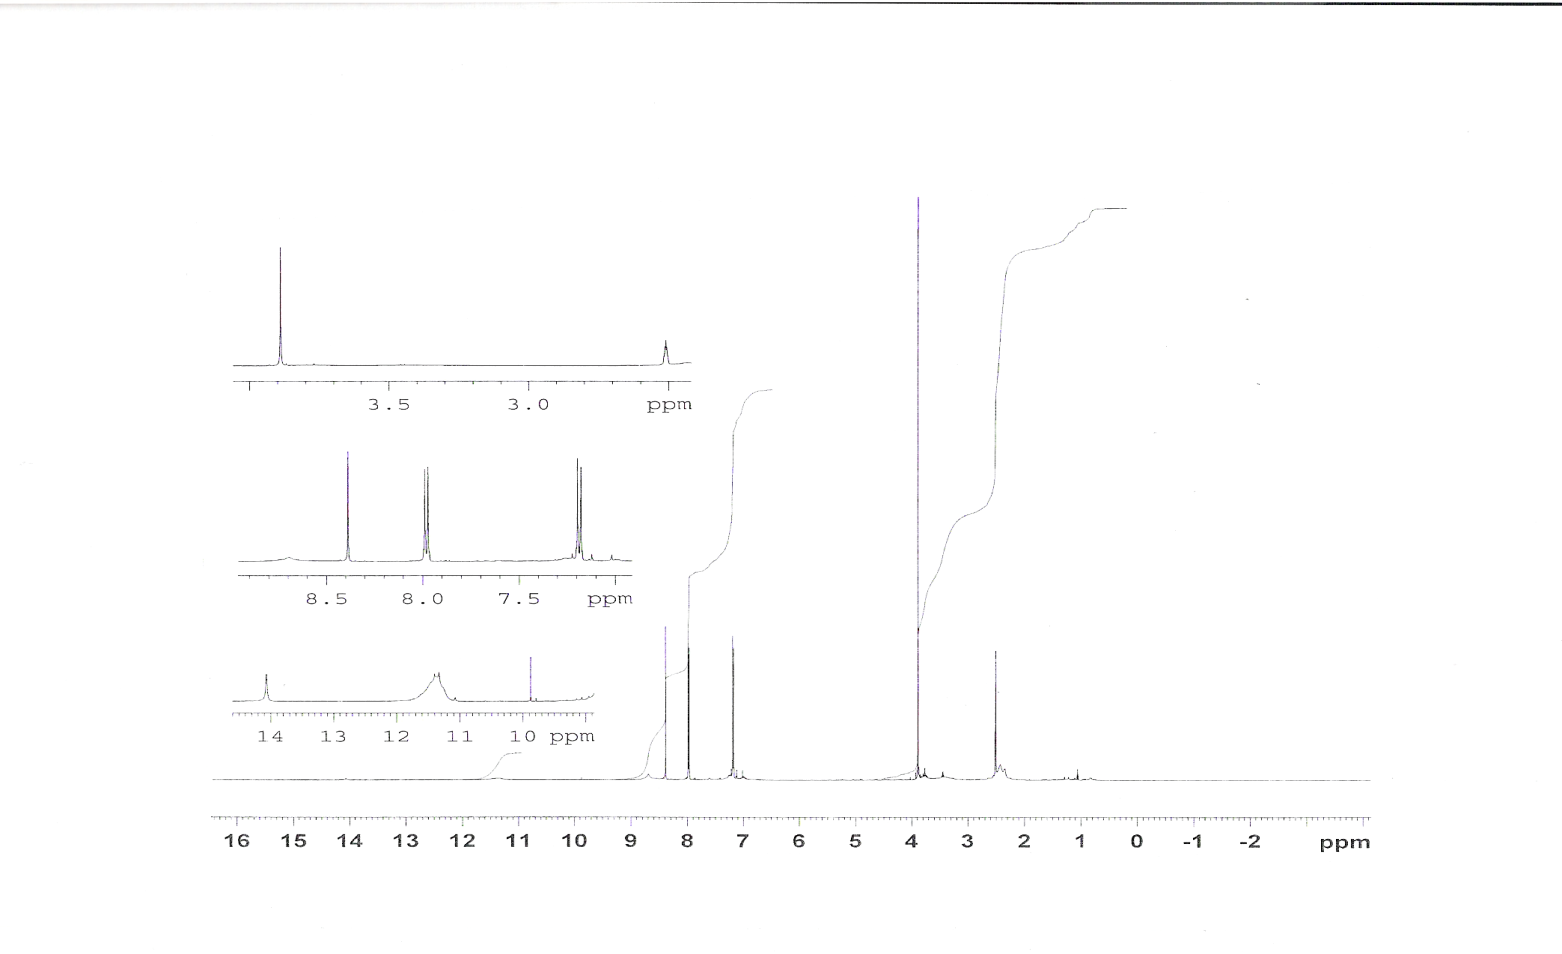
**

**Fig ( 31 ): 1H NMR Spectrum of Compound (22b)…….Solvent DMSO**

**
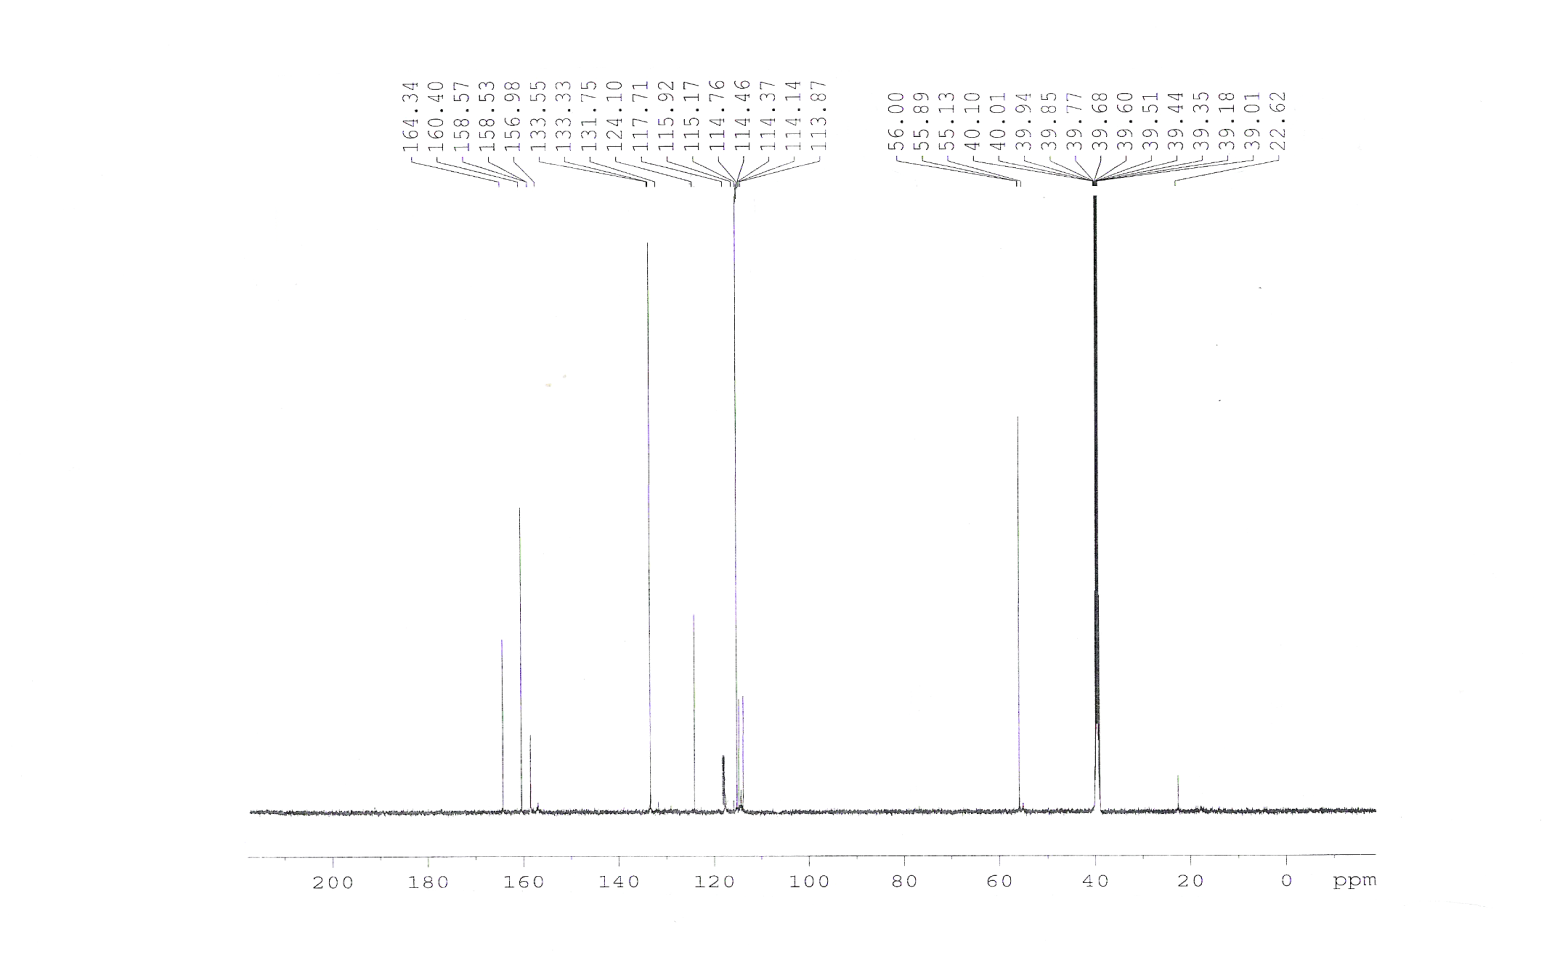
**

**Fig ( 32 ):13C NMR Spectrum of Compound (22b)…….Solvent DMSO**
